# Supplementary material for: Coordination of spike timing among the neurons of the cerebellum
Source: Research Square preprint supplement (doi:10.21203/rs.3.rs-8681449/v1), 2026-01-30
Supplement: Supplementary file 1 [file 7ace3608c2d8b06cbb1b895a.docx]

**Supplementary Materials for:**

**Coordination of spike timing among the neurons of the cerebellum**

Mohammad Amin Fakharian, Elijah A. Taeckens, Alexander N. Vasserman, Alden M. Shoup,
and Reza Shadmehr

Laboratory for Computational Motor Control
Department of Biomedical Engineering
Johns Hopkins School of Medicine, Baltimore MD

**Experimental Methods**

Data were collected from two marmosets, *Callithrix Jacchus*, 350-370 g, subjects 132F (Charlie, 7 years old), and 65F (Barney, 7 years old), during a 2-year period. The marmosets were born and raised in a colony that Prof. Xiaoqin Wang has maintained at the Johns Hopkins School of Medicine since 1996. Our procedures were approved by the Johns Hopkins University Animal Care and Use Committee in compliance with the guidelines of the United States National Institutes of Health.

*Data acquisition*

Following recovery from head-post implantation surgery, the animals were trained to make saccades to visual targets and rewarded with a mixture of applesauce and lab diet 60. Visual targets were presented on an LCD screen with 500Hz refresh rate and low latency (Dell AW2524H). Binocular eye movements were tracked at 2000 Hz using VPIXX eye tracking system. Tongue movements were tracked with a 522 frame/sec Sony IMX287 FLIR camera, with frames captured at 100 Hz.

We performed MRI and CT imaging on each animal and used this data to design an alignment system that defined trajectories from the burr hole to various locations in the cerebellar vermis 60, including points in lobule VI and VII. We used 3D Slicer software to first align the T2 MRI to the marmoset atlas 61. We then aligned the CT scan image to the transferred T2 MRI. We used a piezoelectric, high precision microdrive (0.5 micron resolution) with an integrated absolute encoder (M3-LA-3.4-15 Linear smart stage, New Scale Technologies) to advance the electrode. To reach the cerebellar cortex with Neuropixels 1.0 and Cambridge M1 and M2 silicon probes, we planned a posterior burr hole and avoided the confluence of sinuses using MRI T2 images. This approach enabled us to record from multiple folia in lobules VI and VII simultaneously.

We recorded from the cerebellum using Neuropixels 1.0 probes, as well as 64-channel checkerboard or linear high-density silicon probes (M1 and M2 probes, Cambridge Neurotech). For Neuropixels we used the National Instrument acquisition system (NI PXIe-1071). Data was sampled at 30 kHz and aligned to the eye tracking system time as the reference time using random TTL signals. For the Cambridge M1 and M2 probes we connected each electrode to a 64-channel head stage amplifier and digitizer (RHD2132 and RHD2164, Intan Technologies, USA), then connected the head stage to a communication system (RHD2000 Evaluation Board, Intan Technologies, USA). Because the conductive coating on the Cambridge probes degraded after each insertion into the brain, we re-coated the probes and restored their low impedance after every 3-4 recording sessions 62. For accurate reaction time and visual target time measurements, we measured the monitor latency in real-time with a photodiode and aligned it to the reference time.

*Behavioral protocol*

Each trial began with fixation of a center target after which a primary target appeared at one of 8 randomly selected directions at a distance of 5-6.5 deg. As the subject made a saccade to this primary target, that target was erased, and a secondary target was presented at a distance of 2.5-3.5 deg, also at one of 8 randomly selected directions. The subject was rewarded if following the primary saccade, it made a corrective saccade to the secondary target, landed within a 1.5-2.0 deg radius of the target center, and maintained fixation for at least 200 ms (Fig. 1A). The reward was food that was provided in two small tubes (4.4 mm diameter), one to the left and the other to the right of the animal. A successful trial produced a food increment in one of the tubes and would continue to do so for 50 consecutive trials, then switch to the other tube. Because the food increment was small, the subjects naturally chose to work for a few consecutive trials, tracking the visual targets and allowing the food to accumulate, then stopped tracking and harvested the food via a licking bout 25,63.

We analyzed eye movements using a deep neural network that detected all saccades and microsaccades 64. The pre-trained networks for human and macaque monkeys did not perform well for marmosets. Hence, we designed a custom Matlab GUI-based program to curate the saccades (https://github.com/ShadmehrLCMC/SACCURATE). We then retrained the network through transfer learning for each individual animal using seven 30-45 minutes of recording. To prevent any potential false positive saccades, we pruned the saccades by fitting a bivariable Gaussian distribution to two different feature spaces defined as biologically relevant metrics 65 and removed saccades that were outliers (less than 1% chance of belonging to the distribution). The two feature spaces were the log-log main-sequence plots (maximum velocity vs. amplitude) and the log-log acceleration time to deceleration time ratio vs. amplitude of saccade. We then analyzed and found valid fixations among candidate fixations after or before each detected saccade. We measured and used data-driven thresholds on steady eye position criteria including maximum displacement, dispersion on x and y axes, fixation duration as well as maximum velocity. We discarded fixation candidates with lost eye signals due to instability of eye tracking or blinking.

We detected the onset and offset time of each saccade using a trained neural network, as described above. We then low pass filtered the eye position traces with a 3rd order Butterworth filter with 100 Hz cut-off frequency. We then calculated the saccade velocity by differentiating the eye position trace and found peak velocity times and values. Using the onset, offset and maximum velocity times we formed the acceleration and deceleration duration of each saccade.

*Neurophysiological analysis*

We used OpenEphys 66 for electrophysiology data acquisition, and then used Kilosort 2.0 and Phy 2.0 67 to manually identify and curate the spikes. Each recording was curated twice by two experienced neurophysiologists. We controlled for contamination in the cross-correlograms in P-cell simple and complex spikes and removed the spikelets and double detection of CSs as SSs by aligning the two waveforms to each other and removing the copies in SS units 68. We further tracked the sorted units across three to seven 30-45 minutes of recording using a semi-supervised custom written MATLAB GUI software. To do so, we used electrophysiology properties of the cells including waveform and location on the probe, auto-correlogram and raster plots aligned to saccade onsets. We discarded unstable cells with varying baseline firing rates across time (commonly due to the physical pressure of the probe). Hence not all cells were present for the whole duration of recording. Fig. S1C shows the duration of recording for 50 sessions and the distribution of duration of each cell type recorded. For pair analysis we used the overlapping recordings that both cells were present.

*Quantifying the isolation quality of each neuron*

A summary of the measures used to verify the quality of the neurophysiological data is provided in Fig. S1A. To measure the isolation quality of each neuron, we computed the conditional probability , that is, the probability of a spike at time delay , given that the neuron produced a spike at time zero. We then multiplied this probability by 10000 (bin size 0.1ms) and plotted the results as firing rate (for complex spike auto correlograms, bin size is 2ms). For well-isolated cells, we expected a clean refractory period. To measure the noise rate in each neuron’s spiking, we quantified the average conditional probability at ms, except for complex spikes, for which we used a 10ms period. We also quantified the violations of simple spikes occurrence after complex spikes using their average cross probability for a 5ms period. The data for all cell types are shown in Fig. S1A, second row. For example, to quantify the quality of the P-cells, we measured the noise rate and found that for the simple spikes, this rate was 0.35±0.26 Hz (median ± median absolute deviation, MAD). For the complex spikes, the noise rate was 0±0 Hz.

*Cell type identification*

We performed manual cell type identification through identification of the layers. First, we identified the P-cells via suppression of SS following a CS. As P-cells are large cells, their spike waveforms are present on multiple channels of the silicon probes (Fig. 1C). Next, using the CS waveforms on the channels we identified the orientation of the P-cell’s axon and dendrites, thus identifying the molecular, Purkinje, and granular layers 13,14,68.

For example, we identified the molecular layer via the downward, broad CS waveforms in the dendrite tree of the P-cells (Fig. 1C). In the granular layer we looked for spike waveforms that exhibited an “m” shape with a slow negative after-wave and labeled those cells as pMF glomeruli 69–71. In the molecular layer, we labeled neurons that inhibited the P-cells at 1ms latency or sooner as putative MLI1s (pMLI1), and neurons that inhibited pMLI1s, excited a P-cell, and experienced excitation from CS spillover as pMLI2s 15–17 (Fig. 1D-E). Here our focus is on pMLI1s.

Following the identification of the molecular, P-cell, and granule layers, we identified the putative MLI1 and MLI2s (labeled as pMLI1 and pMLI2) based on their spike interactions with each other and the P-cells 17. These interactions were extracted and measured through cross-correlograms that were then corrected via spike jittering: for each cell pair, the interaction was measured via a cross-correlation, then corrected for chance interaction due to firing rate fluctuations using interval jittering 23, as shown in Fig. 1F, right column. pMLI1s were identified using their milliseconds inhibition of P-cells as well as their synchrony with each other, while pMLI2s were identified through their millisecond suppression of pMLI1s and lack of interaction or later disinhibition of P-cells 17 as shown in Fig. S3. We relied on the interactions of MLIs with P-cells to identify them, then confirmed that their waveform, baseline rates, and auto-correlograms were similar to previous findings in definitively identified neurons in mice 17.

*Using neuron-neuron spike interactions to form cliques*

After acquiring the cross-correlograms for each pair of neurons, we jitter-corrected the result 23. The result clustered the neurons into small networks, called cliques. The procedure began by forming an adjacency matrix (Fig. 1E), where each neuron was a row and a column in the matrix. We then made the adjacency matrix symmetric by keeping the maximum absolute value of the cross correlogram during the 0-3 ms period for each cell pair (causal window). Some pairs within a session did not have an overlapping recording period (gray elements in Fig 1E); we replaced these values with zeros for spectral clustering. Next, we used spectral clustering to divide the adjacency matrix into groups. Spectral clustering is a graph clustering method which uses the adjacency matrix of the graph and represents the nodes (each cell) in a 2D or 3D subspace of eigenvectors of the Laplacian matrix (spectral space). In the spectral space the interconnected nodes have shorter distance from each other than the weakly connected nodes 72. We further verified our cell type identification by ordering neurons in each clique in the adjacency matrix by hierarchical clustering. This algorithm organized the rows of the matrix by putting similar rows next to each other. The result was blocks of sub-matrices with similar interactions within and between cell types.

*Finding the Purkinje layer based on complex spike waveforms within a clique*To further validate our cell-type classification based on the spatiotemporal features of units within each clique, we analyzed the complex spike (CS) waveforms across channels. For each CS unit, we extracted waveforms from its 32 nearest channels and included all of them in the analysis. Channels with absolute peak amplitudes below 25 µV were classified as noise (Fig. S2B). We then combined all CS waveforms and applied UMAP for dimensionality reduction followed by Gaussian mixture model (GMM) clustering to separate dendritic and somatic (axonal) CS waveforms.

For each clique, we represented every channel’s CS waveform as a point labeled 1 (axonal, sharp initially negative spike followed by a long positive period) or –1 (dendritic, broad negative spike) 13,14. Estimating the location of the Purkinje layer was then formulated as finding the decision boundary that best separates these two classes. Because the UMAP clustering (Fig. S2B) was not perfectly separable and some samples lay between dendritic and axonal clusters, we used a robust classifier to handle label uncertainty. Specifically, we applied a weighted logistic regression model designed to reduce the influence of noisy labels (Fig. S2C). Each sample’s weight was proportional to its absolute peak amplitude, normalized by the maximum amplitude within its own group (dendritic or axonal) in each clique; in Fig. S2C, dot sizes represent these weights.

The resulting decision boundaries were then used to rotate and translate the simple spike (SS) and pMLI1 waveforms to align them with the estimated Purkinje layer in each clique. We further realigned the spatiotemporal waveforms along the time axis to match their spike times (Fig. 1C–D). This procedure successfully reproduced the expected simple spike waveforms previously reported in rodent studies 14. Interestingly, after alignment, pMLI1 waveforms exhibited an upward spike near the P-cell axon—a surprising feature, since upward deflections typically occur near dendrites during simple spikes. However, this pattern was consistent with pinceau recordings in rodents 8. A representative multi-contact view of two P-cells, two pMLI1s, and the estimated Purkinje layer within a clique is shown in Fig. S2D.

*Computing the potent vector for each P-cell*

In this region of the cerebellum, the climbing fibers report to the cerebellum the direction of visuomotor events 73,74, likely because of the superior colliculus projections to the inferior olive 75. For example, the climbing fibers reported to the cerebellum both the direction of the visual event, and then independently, the direction of the planned saccade 24. We used the properties of the climbing fiber input that the P-cells of a clique received to assign a potent vector to all the neurons that were a member of the clique. The procedures were identical to those described in 7. Briefly, we quantified this encoding by measuring the CS rate as a function of the direction of the visuomotor event during two different windows: 40 to 85 ms with respect to the visual cue onset, and -70 to +30 ms window from saccade onset. We then fitted a Von Mises distribution to the resulting rates as a function of angle 76. This produced two vectors, one that quantified the strength and direction of the CS response to the visual events, and a second that quantified the strength and direction of the CS response to the motor events. Each vector had an angle and amplitude , where the amplitude identified the sharpness of tuning. Thus, the amplitude of the vector was bounded by 0 (not tuned), and 1 (maximum sharpness). This produced two distinct vectors for each P-cell: one describing the tuning with respect to visual events, and one describing the tuning with respect to motor events. However, encoding of these two vectors were very similar: the magnitude of the vector for the visual event was highly correlated with the magnitude of the vector for the motor event. Hence, for each P-cell in each clique, we used the vector with the larger amplitude and labeled it as its *potent vector*.

*Computing the potent vector for each clique*

We organized the P-cells and the neighboring MLIs into neuronal cliques and then assigned a single potent vector to all the neurons in that clique. To do this, we considered cliques that had at least one P-cell (both SS and CS). We observed that the climbing fibers that projected to the same clique carried information that was much more similar to each other than between cliques 7. To compute the potent vector for a given clique, we performed a vector average of the potent vectors of the P-cells that belonged to that clique, then assigned that single potent vector to all the P-cells and interneurons in that clique.

*Quantifying sub-millisecond spike interactions*

Our objective was to find a robust way to compute the probability of synchronous spiking with respect to chance among pairs of neurons, despite changes in their instantaneous firing rates.

The joint probability of spiking between two neurons, with spike times and , for a given delay and interaction window size w, is defined as:

|  | (2) |
| --- | --- |

Using Bayes theorem, we express the conditional probability (i.e., cross correlogram) as:

|  | (3) |
| --- | --- |

In practice, this formulation is equivalent to counting spike coincidences between the shifted spike train and the spike times of neuron within the defined interaction window . Analogous to firing rate estimation, we define a new spike train , consisting of the simultaneous spikes detected within window between spike trains and . Then, to assess whether observed synchrony reflects meaningful interactions beyond chance coincidences from firing rates, we employed interval jittering 22 to construct a null hypothesis of independent temporal structure. Specifically, the jittered spike train is generated as:

|  | (4) |
| --- | --- |

where denotes the floor operator, and is a random uniform variable on , where is the size of the jitter window. The synchrony hypothesis is tested by evaluating the following inequality:

|  | (5) |
| --- | --- |

Various statistical measures can quantify whether the measured synchrony is different than chance. Two widely used metrics are the synchrony index and covariance:

|  | (6) |
| --- | --- |
|  | (7) |

Both measures capture excess spike coincidences but differ in interpretation: SI is a multiplicative ratio (division), reflecting the fold-change of synchrony relative to chance, whereas reflects an absolute difference (subtraction) between observed and expected coincidence counts. Importantly, covariance also carries a biophysical interpretation, it quantifies the number of joint spikes beyond chance that could influence the downstream targets, providing a more direct link to potential synaptic impact.

However, as pointed out by Herzfeld et al. 26, it is critical to handle numerical instabilities in synchrony index calculation, especially in cases where approaches zero, such as during prolonged pauses in neuronal activity. To mitigate artifacts arising from divisions by near-zero values, we explicitly assign whenever both and are zero. This prevents artificial inflation of synchrony estimates, a misestimation that has been previously observed in spike synchrony analyses 40.

To robustly estimate , we applied a bootstrapping procedure, performing 10 jitter iterations and averaging the results to obtain confidence intervals and reduce estimation variance.

*The joint-jitter plots*

To measure the empirical relationship between observed synchrony and chance synchrony, we plotted against for each neuron pair during the entire recording session (Fig. 2C). To make this plot, for the neuron pair *a* and *b* we defined a new spike train , consisting of the simultaneous spikes detected during window ms. We then jittered one of the neurons and defined a new spike train .

Next, to examine rate-dependent changes in synchrony, we divided each recording into non-overlapping 10 second estimation windows, independent of the animal's behavior. Within each window, we counted the number of joint spikes in the actual data, which provided an estimate of , and compared it to the mean joint spikes after jittering one neuron's spike times, bootstrapped 10 times to estimate . Each point in Fig. 2C represents a 10-second window, plotting the observed joint spikes against the expected joint spikes from jittering.

As the firing rates of the two neurons changed, so did the joint probability. By plotting the measured joint probability as a function of the joint probability of the jittered data, we produced the joint-jitter plots (Fig. 2C). The unity line in these plots represents the expected synchrony under the null hypothesis, i.e., independence. Points above this line indicate excess synchrony, while points below suggest mutual suppression or anti-synchrony.

By plotting the data for each cell pair in the joint-jitter format, we discovered that joint synchrony was approximately a linear function of jittered synchrony (Eq. 1). This implies that regardless of firing rates of the two neurons, the synchrony index remains constant. The linear relationship between joint rates and jittered rates implied that is not constant but varied with the firing rates. Thus, the joint-jitter plots demonstrated that synchrony index was a rate independent measure of synchrony, but not . We confirmed this prediction during saccades (Fig. 3D), finding that SI remained constant.

For calculating the SI and cov during saccades we used similar joint spike train and . We then aligned them to saccade peak velocity times and calculated the trial averaged joint and jittered responses. In order to reduce the noise, we smoothed each rate with a 10ms window moving average smoothing window. Covariance and SI were calculated by subtracting and dividing each time point respectively. Both joint-jittered plots, covariance, and synchrony index plots supported the constant linear relationship (Fig 3) which matched the slopes found both from the whole trace normalized cross correlograms as well as whole session joint-jitter plots (Fig. S9).

*Setting the width of the jitter window*

We employed interval jittering to construct a spike train that reflected the null hypothesis that the spike timing in the two neurons was independent of each other. To generate the jittered spikes, we used Eq. (4) to find the jittered spike times from the original spike times. An alternate method is spike-centered jittering where the spike is moved within a window centered at the location of the original spike. Prior work 23 has demonstrated that spike-centered jittering may be biased toward finding temporal structure where there is none (i.e., false positives). In contrast, interval jittering appears to not have this issue. Thus, here we employed the interval jittering technique.

A critical decision was regarding the size of the jittering interval, i.e., . The value of is required to be large enough so that it keeps the single spike effect intact, while at the same time small enough so that it does not perturb the average firing rate dynamics of the cells. Given the fast nature of saccades and fast dynamics of the pMLI1s our choice of was more restricted than common 20ms for cerebral cortex. However, the submillisecond ultra-fast nature of fast interactions between P-cells and MLI1s allowed us to lower to 5ms. In order to test the effect of on our results, we tested a range of values from 3ms to 100ms (Fig. S18). As P-cells have slower rate dynamics and lower amounts of rate correlation P-cell cross correlograms were highly robust to the choice of (Figure S18A). However, the pMLI1s showed a substantial rate correlation which could be observed both on the jittered cross-correlograms as well as in between-clique interactions. This is consistent with the homogeneous fast dynamics of the pMLI1s with average baseline activities of ~30Hz reaching to 90Hz peaks in 10s of milliseconds for all directions of saccades. Due to fast nature of pMLI1 rates we picked =5ms to prevent overestimation of observed spike synchrony due to the rate correlations.

*Measuring synchrony during saccades*

We began by transforming the synchronous spike events across the entire recording into a new spike train, , representing joint spikes between neurons *a* and *b*. We then generated 10 surrogate spike trains by jittering. Next, we aligned these joint spikes to the peak velocity of saccades and computed peri-stimulus time histograms (PSTHs) to estimate and , where denotes time relative to saccade peak velocity. We smoothed both joint and jittered probabilities using a 10ms moving average window. Using these two smoothed time-dependent probabilities, we computed synchrony index and covariance as a function of time (Eq. 6 & 7). We fixed the numerical instability of division in SI through 10ms smoothing of joint and jittered traces in time and averaging 10 bootstrapping samples to prevent divisions by zero. Finally for all SI calculations, whether whole recording or aligned to the saccades, we accepted the null hypothesis SI=1 when the jittered values were zero.

*Testing the validity of the spike interaction measures*

We measured joint spike probabilities in three different ways. First, we calculated and across the entire recording session for time delays () ranging from –10 ms to +10 ms, using a fine-grained coincidence window of ms. This method produced results similar to cross-correlograms but normalized by the firing rates (Fig. 2B). However, while informative, this approach only provided a time-averaged picture and did not reveal how the joint probability varied as a function of the rates of the two neurons.

Second, to examine rate-dependent changes in synchrony, we divided each recording session into non-overlapping 10-second estimation windows, independent of the animal's behavior. Within each window, we counted the number of joint spikes in the actual data and compared it to the mean joint spikes after jittering one neuron's spike times, bootstrapped 10 times to estimate . This produced the joint-jitter plots. Remarkably, these plots revealed a linear relationship: as the jittered joint spiking rate increased, the observed joint spiking also increased linearly, consistently diverging above the unity line. This indicated that as cell pairs increased their firing rates, they also aligned their spikes more precisely than expected by chance, resulting in a rate-dependent covariance. Furthermore, different neuron pairs exhibited distinct slopes, allowing us to classify them into groups with varying synchrony indices (Fig. 2F). We interpreted these slopes as biophysical manifolds that characterized how synchronous spike probability scaled with joint firing rates for each cell pair. This is because the x-axis of these plots is related to the firing rates of each neuron as follows:

|  | (8) |
| --- | --- |

Third, to test whether these synchrony manifolds changed during behavior, specifically during saccades, we transformed the synchronous spike events into a new spike train, , representing joint spikes. We also generated 10 surrogate spike trains via jittering for comparison. We then aligned these joint spikes to the peak velocity of saccades and computed peri-stimulus time histograms (PSTHs) to estimate and , where denotes time relative to saccade peak velocity. We smoothed joint and jittered probabilities in time using a 10ms moving average window. Plotting against during the saccade epochs revealed that the synchrony remained confined to the same biophysical manifold identified in the second approach, maintaining a consistent slope throughout the movement (Fig. 3C). This result suggested that the spike-time coordination between MLI1s and P-cells was not dynamically modulated by the behavior itself but was a stable, rate-dependent property of the circuit that scaled with activity levels.

*Measuring interactions between MLIs and P-cells via conditional probabilities*

The corrected joint probability, i.e., measures how many additional spikes per unit of time are being conveyed to downstream targets by a pair of neurons, beyond what would be expected by chance. This makes joint probability a meaningful metric for inferring the graphical structure of the circuit, particularly when assessing whether spike alignments from a neuron pair could influence a common downstream target. However, to evaluate the effect of one neuron on another, such as the effect of MLI1s projecting onto P-cells, the conditional probability is a more appropriate measure.

The conditional probability quantifies how the firing rate of a postsynaptic neuron changes aligned to the spike times of a presynaptic neuron , with a time delay () parameter explicitly capturing how this interaction evolves across different temporal offsets. To determine whether the observed suppression reflects a true causal interaction rather than a byproduct of correlated firing rates, we extended our interval jittering approach to statistically assess the significance of these interactions. This method effectively decomposes rate correlations driven by common parallel fiber inputs, isolating fast, spike-induced suppressions that arise from direct inhibitory interactions.

Figure 4A illustrates a spectrum of P-cell suppression profiles following MLI1 spikes. While some P-cells exhibited only a sharp, fast-latency suppression consistent with pinceau-mediated ephaptic inhibition, others display a secondary, more prolonged suppression, reflecting an increasing contribution of GABAergic synaptic inhibition. The larger the GABA component, the more pronounced the post-suppression rebound, revealing a gradient of inhibitory influence across different P-cell–MLI1 pairs.

A key concern in interpreting suppression based on spike probabilities is that we are not directly measuring the inhibitory currents, but rather the probability of spike omissions. This introduces a limitation: if the postsynaptic P-cell is silent at a given moment, an inhibitory input cannot further suppress its firing probability. Consequently, our conditional probability measure may underestimate inhibition effects at low firing rates. This limitation arises from the measurement method, not from a failure of the inhibitory mechanism itself.

To mitigate this, we introduced a firing-rate-normalized conditional probability measure that conditioned the observed suppression not only on the presynaptic spike timing but also on the instantaneous firing rate (IFR) of the postsynaptic neuron (Fig. 4A). This method built upon prior work on 3D auto-correlograms 26, where autocorrelation structures of single neurons were conditioned on their own instantaneous firing rates. Our extension generalized this concept to cross-correlograms between two neurons by conditioning the postsynaptic neuron's response to presynaptic spikes based on its instantaneous firing rate dynamics at the time of the interaction. We defined this conditional probability as , where is a smoothed estimate of the instantaneous firing rate of neuron at the time of each presynaptic spike.

For each spike of neuron , we assigned the corresponding instantaneous firing rate of neuron at that moment. We then compute the conditional probability by considering all spikes of neuron , but only a subgroup of neuron spikes that occur when neuron ’s firing rate fell within a specified range. This allowed us to analyze how postsynaptic response varied as a function of local firing rates (Fig. 4A). This approach allowed for fair comparisons across neuron pairs with differing baseline firing rates, ensuring that the suppression of the MLI on the P-cell was not confounded by periods of inactivity in the P-cell.

*Effect of the MLI1 synchronous spikes on the downstream P-cell*

We investigated whether synchronous spikes from multiple MLI1s could cumulatively enhance the suppression of a downstream P-cell (Fig. 4B). Given the rapid and potent inhibitory effect of a single pMLI1 spike on a P-cell, it was plausible that synchrony within the upstream pMLI1 population played a functional role by summing their effects (superposition) to induce a stronger suppression. To test this, we identified triplets of neurons consisting of two connected pMLI1s and their common downstream P-cell and computed the following conditional probability: . In this expression, is MLIa spiking at time t, is MLIb spiking at some time earlier, is the instantaneous firing rate of the P-cell at time t (see below for more detail on instantaneous firing rate calculation), and is the probability of the simple spike occurring at a time after the MLIa spike. As shown in Fig. 4B, sequential pMLI1 spikes evoke largely independent suppressive effects on the P-cell when separated by a couple of milliseconds. However, when the two pMLI1 spikes occurred within a narrow time window (within a millisecond), their suppressive effects added, resulting in a significantly larger suppression of the P-cell’s firing probability. This observation suggests that spike synchrony within the pMLI1 population can effectively modulate the strength of inhibition exerted on P-cells through superposition.

We further tested the superposition of two pMLI1s in two ways. First, if the principle of superposition holds, the combined effect of two MLI spikes with a temporal delay should be predictable by adding their individual, time-shifted suppression profiles on the downstream P-cell. We evaluated this by comparing the observed and estimated suppression across three temporal phases: the pinceau period (0–0.8 ms after the MLI spike), the GABAergic period (0.8–2.5 ms), and the rebound period (2.5–6 ms), as shown in Fig. S18A (dashed lines: observed; solid lines: estimated). To quantify uncertainty of estimation, through bootstrapping, we computed error bounds by jittering the timing of one MLI within a 1 ms window, matching the delay range between the two MLIs.

Second, if superposition holds, the joint suppression produced by two MLIs should correlate with the sum of their individual suppressions and be independent of the difference between them. In other words, the downstream effect of one strongly suppressive MLI paired with a weak or non-connected MLI should be equivalent to that of two MLIs exerting similar moderate suppressions whose sum equals the same total. Fig. S18B shows the observed suppression of P-cells as a function of the predicted superposed suppression (i.e., the sum of individual MLI suppressions), binned according to the difference in their suppressive effects. Fig. S18C reports the correlation coefficients for each difference bin, confirming that the observed suppression closely follows the predicted superposition relationship.

*Computing the instantaneous firing rate*

To compute the instantaneous firing rate of a neuron, where is the time that a spike occurred, we used an adaptive smoothing window. First, the raw instantaneous firing rate was defined at each time point as the inverse of the inter-spike interval between the two spikes immediately preceding and following . Next, we used an adaptive algorithm to compute a smoothing window size for each . The width of this smoothing window was 700 ms divided by the number of spikes contained in a 100 ms window centered on . These parameters were chosen so that, on average, the smoothing window contained approximately 7 spikes. The instantaneous firing rate, at each spike time was the average of the raw firing rate within a window centered on , with duration equal to the smoothing window duration described above. Simulations were used to determine the window size needed to prevent overfitting the firing rate to the spike times.

To test whether our algorithm for estimating the instantaneous firing rate was accurate, we performed simulations via a P-cell model (see below) for which the ground truth regarding firing rate was known. In these simulations (Fig. S14) confirmed that our algorithm for estimating the neuron’s instantaneous firing rates was accurate.

*Phase normalization of spike timing*

Consider a neuron whose spike timing remains regular despite changes in firing rates. To understand spike timing of this neuron, imagine a clock that runs from 0 to at a speed that is defined by the instantaneous firing rate of that neuron. Thus, as the firing rate increases, the clock runs faster. This neuron can generate a spike at any time beyond its refractory period, but because the neuron is regular, if it has generated a spike at time 0 then the timing of the next spike will be a probability distribution that has a strong peak centered around , no matter what its instantaneous firing rate may be. If the neuron is not very regular, the spike timing will be widely distributed with a weaker peak around .

For example, the P-cells in Fig. 5C have spike timing with an initial peak at , followed by a second peak at . In contrast, the pMLI1s have a more uniform distribution. Thus, the P-cells have a greater reliance on an internal clock than the pMLI1s.

Using the internal clock analogy, we set out to measure the spiking probability for each neuron in terms of the phase of its internal clock, where the speed with which the internal clock runs is defined by that neuron’s instantaneous firing rate , where the time of a spike is specified by . In other words, the phase was defined locally at each spike time.

Given that the neuron spiked at time , the phase with respect to at any other time was defined as:

|  | (9) |
| --- | --- |

In this equation, the time difference is measured in seconds, while the firing rate is is measured in spikes/sec. Thus, their product is a unitless quantity that is equal to one when the time elapsed equals the inverse of the instantaneous firing rate. The product represents the ratio of the time elapsed to the expected time of the next spike. We then scale by a factor of to express this ratio in the form of the phase of an oscillator in units of radians, such that it completes one full cycle (i.e. radians) within the expected interspike interval.

The conditional probability plot in Fig. 5C (left subplot), where firing rate is represented as spikes/cycle, was constructed by iterating over each spike time in the spike train and obtaining the phase of every other spike time with respect to the current spike, then plotting a histogram of the frequency of occurrence of each phase. We used a bin size of /50 radians, or 1/50 of a full cycle of the neuron’s internal clock. The probability of a spike occurring in each phase bin was normalized by dividing by the bin size to obtain a firing rate in units of spikes/cycle. This is analogous to how traditional time-based spiking probabilities are normalized to spikes/second.

To give an intuition regarding Fig. 5C, consider the following. By definition, a neuron fires on average one spike per cycle, since 1 cycle is the length of its expected inter-spike interval, so the phase probability plot for a pure Poisson neuron with independent spike times and no refractory period would be a flat line with a value of 1. If the normalized spiking probability for a neuron at a given phase is greater than 1, then the spike times tend to be concentrated at that part of the cycle, whereas if the normalized spiking probability is less than 1, then the spikes are less likely to occur at that part of the cycle than they would be for a Poisson neuron of the same rate.

*Phase resetting via ephaptic interactions*

Having established a method for estimating the phase of a neuron’s internal clock, we next examined how the phase of the internal clock affected interactions with neighboring cells. For each within-clique pair of P-cells, we found the conditional probability of PCa spiking as a function of the timing of a PCb spike relative to PCa’s clock. Specifically, we binned pairs of PCa and PCb spikes by the phase of PCa’s internal clock when the PCb spike occurred, . Again, we used a bin size of /50 radians, such that a pair of spikes ( fell within a particular bin centered at if /50. Next, we iterated over all pairs ( within each bin and found the phase of every other PCa spike with respect to , and then obtained a histogram of the frequency of occurrence of each phase, as described above. This gave us the spiking probability of PCa as a function of its clock phase conditioned on a PCa-PCb interval, . Representative examples for three different values of are shown in Fig. 5D (top). These plots reveal how the effectiveness of ephaptic coupling for inducing spikes in a given cell is modulated by that cell’s clock phase. As a control, we did the same analysis after jittering the spike train of PCb, finding that the change in spiking probability was dependent on precise spike timing.

Next, we asked whether an ephaptic interaction with a neighboring cell could reset the phase of a P-cell’s internal clock. For instance, if PCb induced an “off-cycle” ephaptic spike in PCa, such as when PCa’s phase was at , would the next PCa spike also be off-cycle, or would its phase return to what it would have been in the absence of an ephaptic spike? In other words, did an ephaptic interaction affect the behavior of a P-cell only transiently or did it induce a long-term change in the cell’s spike timing? To answer this question, we again considered within-clique pairs of P-cells, PCa and PCb, and classified pairs of spike times ( as putative ephaptic spiking events if occurred less than 0.5 ms after . We then repeated the analysis described above, binning each pair ( by the normalized interspike interval and finding a histogram of PCa interspike intervals for each bin, but this time we restricted our analysis to only include pairs ( where was part of a putative ephaptic event. We also restricted PCa spike times to those that occurred after the putative ephaptic event, because we were interested in understanding how the ephaptic event affected the P-cell’s spike timing going forward. Results for the same three values of are shown in Fig. 5D (bottom). The control is the same as in Fig. 5D (top).

To summarize the results from Fig. 5D (top), we plotted the probability that a PCb spike induced an ephaptic spike in PCa as a function of PCa’s phase (Fig 5E, left). To do this, we iterated over each bin of normalized PCa-PCb intervals, , and then counted the number of putative ephaptic spiking events divided by the total number of spike timing pairs ( in each bin. Some of these putative spiking events will occur purely by chance, rather than being the result of an ephaptic interaction. Therefore, to estimate the true ephaptic spiking probability, we repeated the same analysis after jittering the spike times of PCb and subtracted the jittered probability from the true probability.

Fig. 5D (bottom) shows that an ephaptic spike at off phase (e.g. at or 3) induced a phase change in the cyclical spike timing probability of the P-cell, while an ephaptic spike induced on phase (at 2), produced less of a phase change. To quantify this phase change, we found the expected change in PCa phase after a putative ephaptic event as a function of the phase of PCa at the time of the ephaptic event. As above, we found all spike timing pairs ( where was part of a putative ephaptic event and binned them by the normalized PCa-PCb interval . For each spike pair (, we found the phase of the first spike after the putative ephaptic event, . This gives us a distribution of phases which we wish to compare to a control that shows what the distribution would have been had there not been a putative ephaptic event. The first PCa spike after a putative ephaptic event is of course the second PCa spike after (since the first one is included in the ephaptic event), so a useful control is the distribution of the phase of the second PCa spike after a spike in the jittered PCb train, again binned by .

Phases are circular values, so the expected phase change is not simply the difference between the means of these two distributions (because a phase change of is equivalent to no change at all). Instead, we found the difference between the circular means of each distribution. Let denote the k-th instance of following an ephaptic spiking event for a given PCa-PCb interval bin, and let be the k-th instance of following a jittered PCb spike. Then the angle difference between the two distributions is , where

|  | (10) |
| --- | --- |

To average over all P-cell pairs, we found the complex vector z corresponding to each pair and then defined the mean expected phase change as . 95% confidence intervals were determined by bootstrapping.

*Modeling ephaptic coupling among P-cells*

To investigate the role of ephaptic coupling in coordinating spike timing among P-cells, we developed a two-compartment linear integrate to fire (LIF) model (soma and axon initial segment, AIS) of pairs of P-cells where somatic membrane potential evolved according to traditional LIF 5,14,18.

|  | (11) |
| --- | --- |

In above, represents membrane capacitance and represents membrane voltage. At each time step, the change in P-cell somatic membrane voltage was determined from the net sum of various input currents: a leak current , a net input current mapped from a target rate function , and a net membrane noise :

|  | (12) |
| --- | --- |

The leak current at each time point was calculated as the driving force of the membrane voltage at the prior time step scaled by the leak conductance. Here, is the membrane reversal potential (-70 mV) and is the leak conductance (0.1 ):

|  | (13) |
| --- | --- |

The net current at each time point was calculated via a target instantaneous rate scaled linearly by a constant . This was numerically set to produce the target firing rates given constant membrane leak conductance and capacitance values. The target rate function was built from saccade-aligned simple spike rates from actual P-cells (dataset size *n* = 226, with *n* = 101 bursters and *n* = 125 pausers). For each simulation, a pair of P-cells (burster-burster, burster-pauser, or pauser-pauser) was chosen, and two matching real P-cell profiles were randomly selected from the dataset, interpolated from 1 kHz to 30 kHz to match the model timestep, and tiled across trials to span multiple behavioral periods:

|  | (14) |
| --- | --- |

The net noise term was a zero mean Gaussian noise with scaling factor . Here, controlled spike-train regularity: a low value represented little random noise input to the P-cell, and therefore high regularity, whereas a high value represented large random noise input to the P-cell, and therefore low regularity with non-significant effect on average firing rates:

|  | (15) |
| --- | --- |

Once the net current at a given time point was determined, the soma membrane voltage of each P-cell was updated using forward Euler integration.

Each neuron’s AIS voltage is the sum of two components: an intrinsic voltage component which follows that neuron’s somatic voltage , and a weighted voltage which is the voltage perturbation driven by the extracellular field produced by spikes in the nearby neurons through coupling matrix :

|  | (16) |
| --- | --- |

Here, is the i-th column and j-th row of an nxn connectivity matrix. For our simulation we consider as a symmetric 2x2 coupling matrix which was determined by the AIS-AIS distance () between the simulated pairs of neurons using the distance scaling rule from 5 where is a geometry/offset constant that captures out-of-plane separation between the neurons and avoids numerical issues at :

|  | (17) |
| --- | --- |

Each neuron’s extracellular field is the convolution of its spike train with an extracellular kernel constructed from the AIS spike waveform (Eq. 17). When modeling ephaptic inhibition at the MLI1-PC pinceau, Blot and Barbour 18 approximate the extracellular voltage at the pinceau as proportional to the negative derivative of the intra-pinceau potential. We apply this same approximation for our extracellular kernel and model the extracellular voltage as proportional to the negative derivative of the intrinsic voltage at the AIS. For ephaptic coupling, the relevant intrinsic voltage at the AIS is the extracellular simple spike waveform, which we model using a gamma kernel .

|  | (18) |
| --- | --- |

A neuron spikes when the total voltage at the AIS exceeds the threshold voltage (-55 mV) at a given time point, and the neuron is not already in a refractory period. Upon a spike, and are both clamped to for a 1 ms refractory period during which no new spikes can be emitted. Table 1 provides the values for the parameters used in the P-cell simulations. We matched the parameters of the kernel to get a cross-correlogram shape that resembled real cross-correlograms in data (Fig. 1F and Fig. S13C).

*Modeling gap-junction among pairs of MLI1s*

To investigate the role of gap junctions in coordinating spike timing in MLI1s, we developed a conductance-based leaky integrate-to-fire model (Eq. 1):

|  | (19) |
| --- | --- |

At each time step, the change in model MLI1 membrane voltage was determined from the net sum of various input currents: a leak current , an excitatory current derived from simulated parallel fiber (PF) input , a gap junction current , and a bias current . Once the net current at that time point was determined, the membrane voltage was updated using forward Euler integration.

|  | (20) |
| --- | --- |

The leak current at each time point was calculated as the driving force of the membrane voltage at the prior time step scaled by the leak conductance (Eq. 21). Here, is the membrane reversal potential (-70 mV) and is the membrane leak conductance (2.5 nS).

|  | (21) |
| --- | --- |

The excitatory current at each time point was calculated as the glutamatergic driving force scaled by an excitatory conductance kernel (Eq. 21). Here, is the reversal potential of the excitatory glutamatergic PF-MLI synapse (0 mV), and is a kernel basis function designed to mimic the time course of a glutamatergic synaptic transient:

|  | (22) |
| --- | --- |

To properly mimic the time course of an AMPA excitatory postsynaptic current (EPSC) at the PF-MLI synapse, we followed standard convention for modeling AMPA synaptic transients in existing computational modeling literature and modeled the excitatory conductance kernel as a difference of exponentials parametrized by , and , where is the time in ms since PF spike arrival, and and are respectively the rise and decay time constant parameters of the AMPA synaptic transient. The values of = 0.166 ms and = 2.938 ms were determined sourcing a variety of AMPA synaptic transient time constant values from existing computational modeling or stimulation papers and then fitting a difference of exponentials function to the average AMPA model (Eq. 23) 77–81.

|  | (23) |
| --- | --- |

To determine the excitatory conductance at a given time point, each PF's spike train was convolved with the excitatory conductance kernel. Then, each PF's excitatory conductance value at that time was weighted by the randomly assigned synaptic strength of that given PF-MLI connection. The final excitatory conductance for that time point was then calculated as the sum of all weighted PF conductances at that time point.

The spike train for each PF was generated via a non-homogeneous Poisson process with a post-spike refractory period of 0.5ms. First, a candidate spike was drawn from a homogeneous Poisson process parameterized by a constant rate (). If the candidate spike occurs at least 0.5 ms after the most recent spike, it was then either accepted or rejected via a thinning process (a spike at time is accepted with probability ). This made the Poisson rate function dynamic and thereby rendered the Poisson process non-homogeneous (Eq. 25).

|  | (24) |
| --- | --- |

This effectively ensured that the frequency of PF spikes over time corresponded to the input time-dependent instantaneous rate function which served as a proxy for behaviorally driven PF excitation.

Granule cells typically receive presynaptic inputs from 4 mossy fibers 82, which themselves receive input originating from all over the brainstem and cerebral cortex. In the oculomotor vermis of the cerebellum, “state” mossy fibers convey efference copies of a saccadic movement command with various delays to the downstream PFs 7,83–85. In Eq. (24), is a sequence of evenly spaced kernel functions (3 per 1000 ms) designed to represent the average firing rate of saccade-responsive state mossy fibers (Fig. S11B).

To simulate the excitatory input that a given PF might receive, we used our recorded data from n = 222 “state” MFs 7. For each PF, we randomly determined how many MF inputs it would receive (3-5) and then randomly selected that many MFs from the real data. Each selected MF input was assigned a random synaptic weight (0-1). The selected MF average responses during task-relevant saccades were then scaled according to the assigned synaptic weight, and the average of the weighted MF rates was then taken and normalized to serve as the basis function for that PF (Fig. S11B).

Additionally, each PF-MLI connection was assigned a random, nonnegative synaptic weight (0-1). Using these PF inputs, we simulated 3 saccades per second with a random scaling of peak velocity (uniform between 0 and 4). Assuming linear relationship between the rates and peak velocities 7,83–85, for each saccade we modeled the PF rate in time scaled according to the peak velocity to form .

To avoid any edge artifacts at the end of the PF basis function, we interpolated from the last value of the basis function to the baseline value of 0 using MATLAB's implementation of the Piecewise Cubic Hermite Interpolating Polynomial algorithm 86.

The gap junction current at each time point was calculated as the membrane voltage of the paired MLIs at the prior time point, scaled by the gap junction conductance .

|  | (25) |
| --- | --- |

Here, represents the voltage difference between the two MLIs and represents the current going from neuron j to neuron i. For networks with more than two MLIs, the gap junction current was additionally scaled by the Laplacian matrix

|  | (26) |
| --- | --- |

Here, the graph Laplacian represents the adjacency structure of the MLIs in the network and was computed from a randomly generated symmetric adjacency matrix () with connection probability .

|  | (27) |
| --- | --- |

The bias current at each time point was comprised of a constant component ( = 0.028) and a Gaussian noise component () which was scaled by = 0.05. This bias current represents the randomly fluctuating input that gives the MLIs a baseline firing rate:

|  | (28) |
| --- | --- |

Once the net current was calculated, the membrane voltage of each MLI was updated using the Forward Euler method. During the simulation, any neuron which had a membrane voltage above threshold entered a refractory period for 0.5 ms during which its voltage was clamped to a predefined spike shape. To investigate the role that gap junction conductance plays in shaping MLI synchronous spiking, we simulated a network with 10 PFs and 2 MLIs 250 times for four different gap junction conductance values. The parameter values for the MLI simulations are provided in Table 2.

*Statistical testing*

We performed t-tests, or rank sum tests, or ANOVAs, to compare distributions.

**
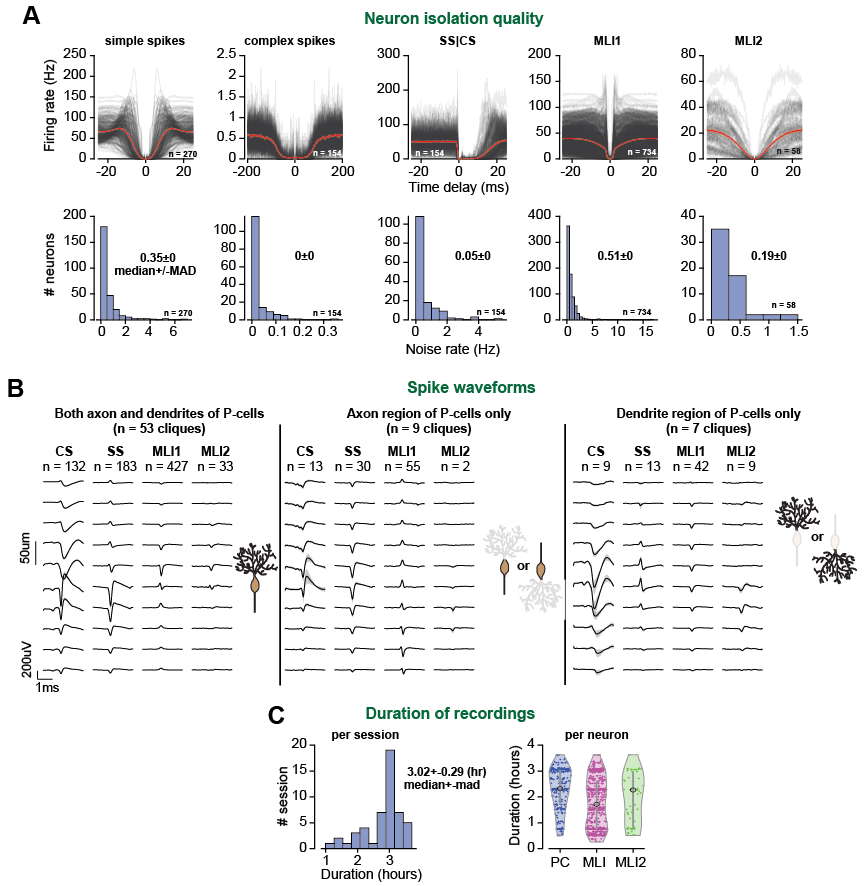
**

**Fig. S1. Isolation quality and duration of recording of the neurons in the database. (A)** Top: High resolution auto-correlograms (and SS|CS cross correlogram) of each cell type with average traces (red). SS|CS describes the conditional probability of an SS, given that a CS occurred at time zero. The probabilities are for bins of 0.1 ms duration and are multiplied by 10000 to represent spike rate in Hz (except for CS|CS which bin size is 2ms). Bottom: refractory violation distribution of for each cell type (<1ms for all neurons except complex spikes and SS|CS: <5ms and CS|CS: <10ms). **(B)** Normalized spatiotemporal aligned waveforms of each cell type using clique complex spike dendritic and axonal shape (see Fig, S2 for more details) plotted as a function of distance of the electrode with respect to the P-cell layer or electrode with maximum CS waveform. The cliques are divided into (left) full P-cell waveforms with both dendritic and somatic spike shape, (middle) cliques with only axonal complex spike waveforms, (right) cliques with only dendritic complex spike waveforms. **(C)** Duration of the neurophysiological recording (50 sessions), and duration of isolation for each cell type. Circles are medians, and the lines are median absolute distance (MAD).

**
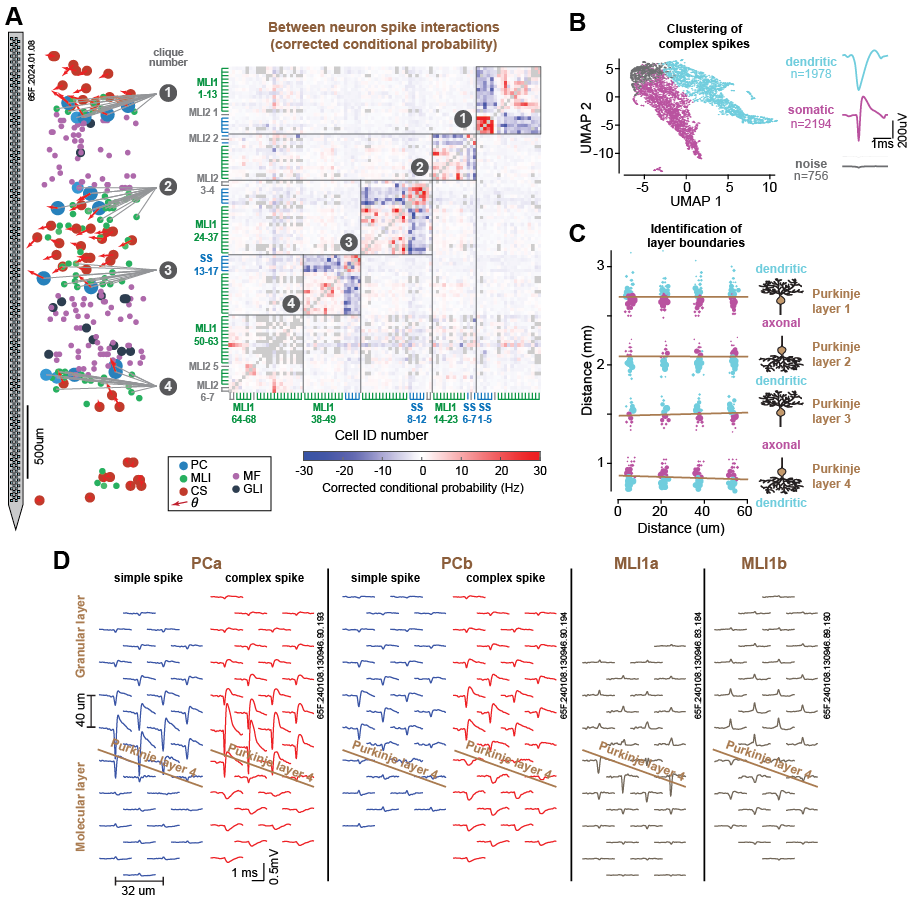
**

**Fig. S2. Detection of P-cell layer based on complex spike waveform. (A)** (left) Example Neuropixels session with 4 neuronal cliques. (Right) Adjacency matrix showing simultaneously recorded neurons (rows and columns). Color intensity indicates the strength of jitter-corrected conditional spike interactions. Cliques and outliers are outlined. **(B)** Clustering all complex spike waveforms on each electrode contact into dendritic and somatic spikes using UMAP and Gaussian Mixture Model (waveforms with less than 25uV absolute peak are tagged as noise channels, gray group). **(C)** Complex spike waveforms color coded by dendritic (cyan) and somatic (magenta) for each electrode recording a CS unit. The size of the points represents the logistic regression weights based on the size of the spike waveform used to find the classification boundary (Purkinje layer). **(D)** Multi-contact waveform oftwo example P-cells and pMLI1s from Purkinje layer 4 alongside the estimated Purkinje layer based on complex spike waveform.

**
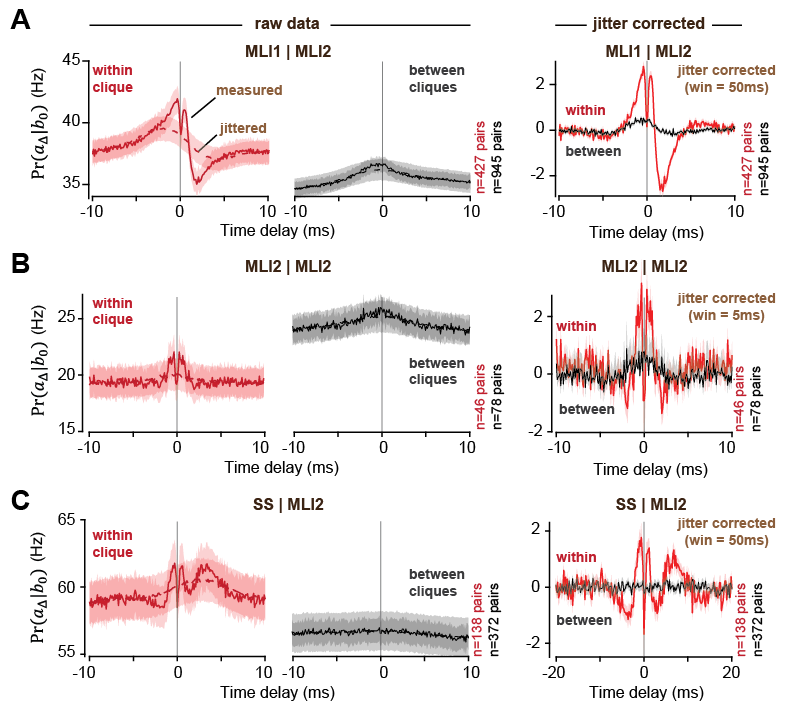
**

**Fig. S3. Interactions of pMLI2 with various cell types. (A)** pMLI1 and pMLI2 interactions: spike probability in pMLI1 given that a pMLI2 spike occurred at 0ms for pairs within (left) and between (middle) cliques, alongside jittered traces (dashed lines). (right) Jitter subtracted cross probabilities. The size of the jitter window is indicated. **(B)** Same as (A) but for pMLI2|pMLI2. **(C)** same as (A) but for SS|pMLI2.

**
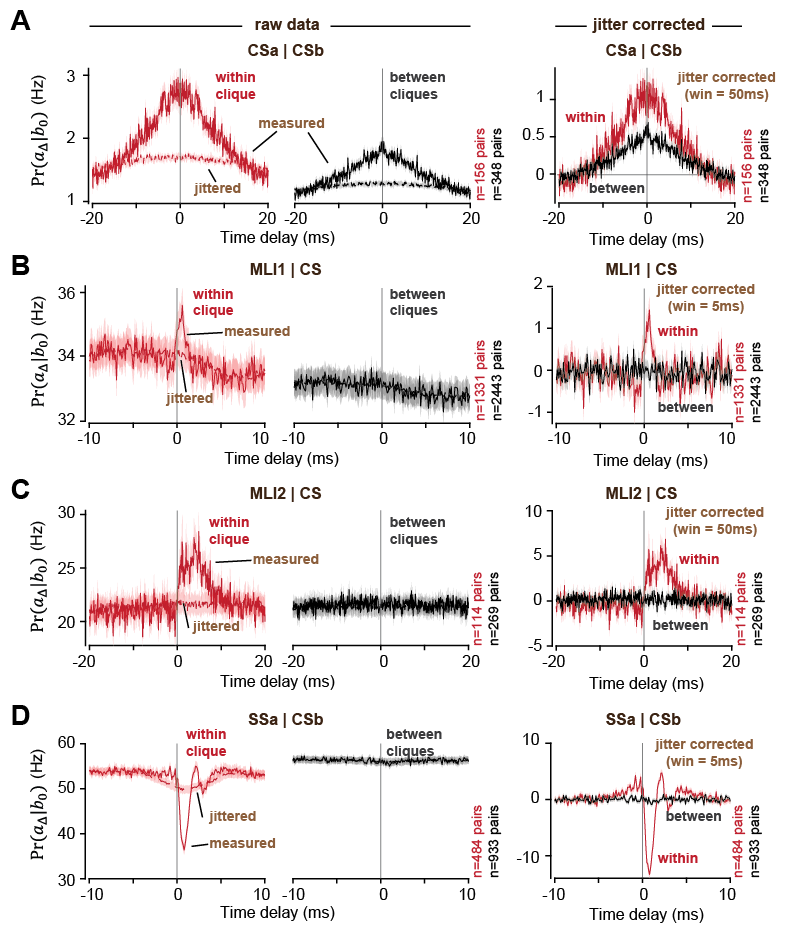
**

**Fig. S4. Climbing fiber interactions with various cell types. (A)** CS cross probability given another CS that occurred for pairs of climbing fibers *a* and *b* within (left) and between (middle) cliques alongside jittered traces (dashed lines). (right) Jitter subtracted cross probabilities. **(B)** Same as (A) but for pMLI1|CS (spill over). The size of the jittered window is indicated. **(C)** same as (A) but for pMLI2|CS (spill over). **(D)** same as (A) but for SSa|CSb for different pairs of P-cells *a* and *b* (ephaptic suppression).

**
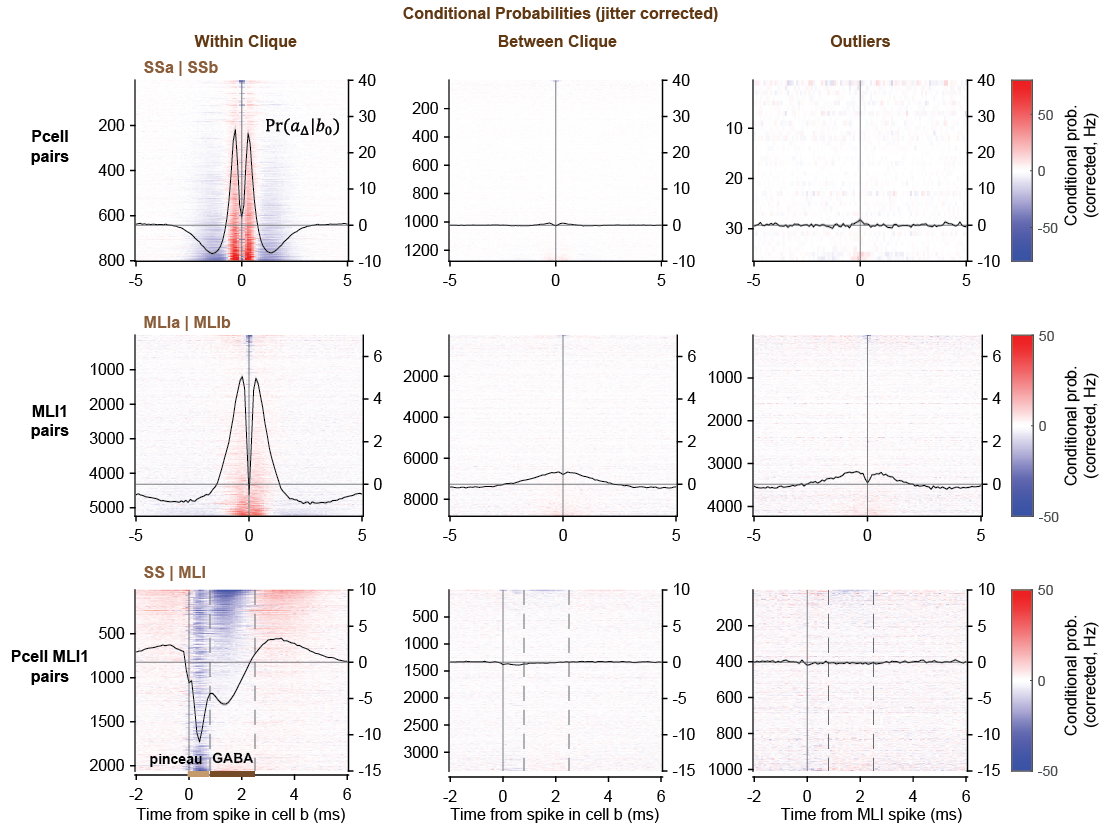
**

**Fig. S5. High-resolution jitter-corrected conditional probabilities for all cell pairs within-clique, between-clique, and outliers.** Heat map and average of jitter-subtracted interactions between P-cell|P-cell (top), pMLI1|pMLI1 (middle), and P-cell|pMLI1 (bottom) pairs within (left), between (middle) cliques and outliers (right). The pairs are sorted by average values within the -1ms to +1ms period for P-cell|P-cell and pMLI1|pMLI1 pairs and 0.8 to 2.5ms (GABA suppression period) for P-cell | pMLI1 pairs.

**
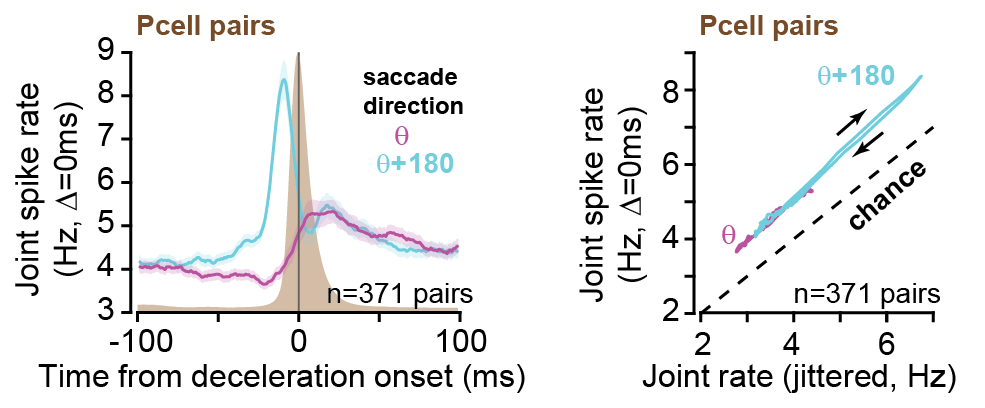
**

**Fig. S6. Joint probability remains on the same manifold throughout the entire saccade.** (left) Average joint spike rate of P-cell pairs within clique for saccades in direction of the potent vector, and potent+180. (right) Joint-jitter plots for the same saccades. Arrows indicate direction of change in the plot. Note that as firing rates change, the joint spike rate remains on the same line without exhibiting any hysteresis.


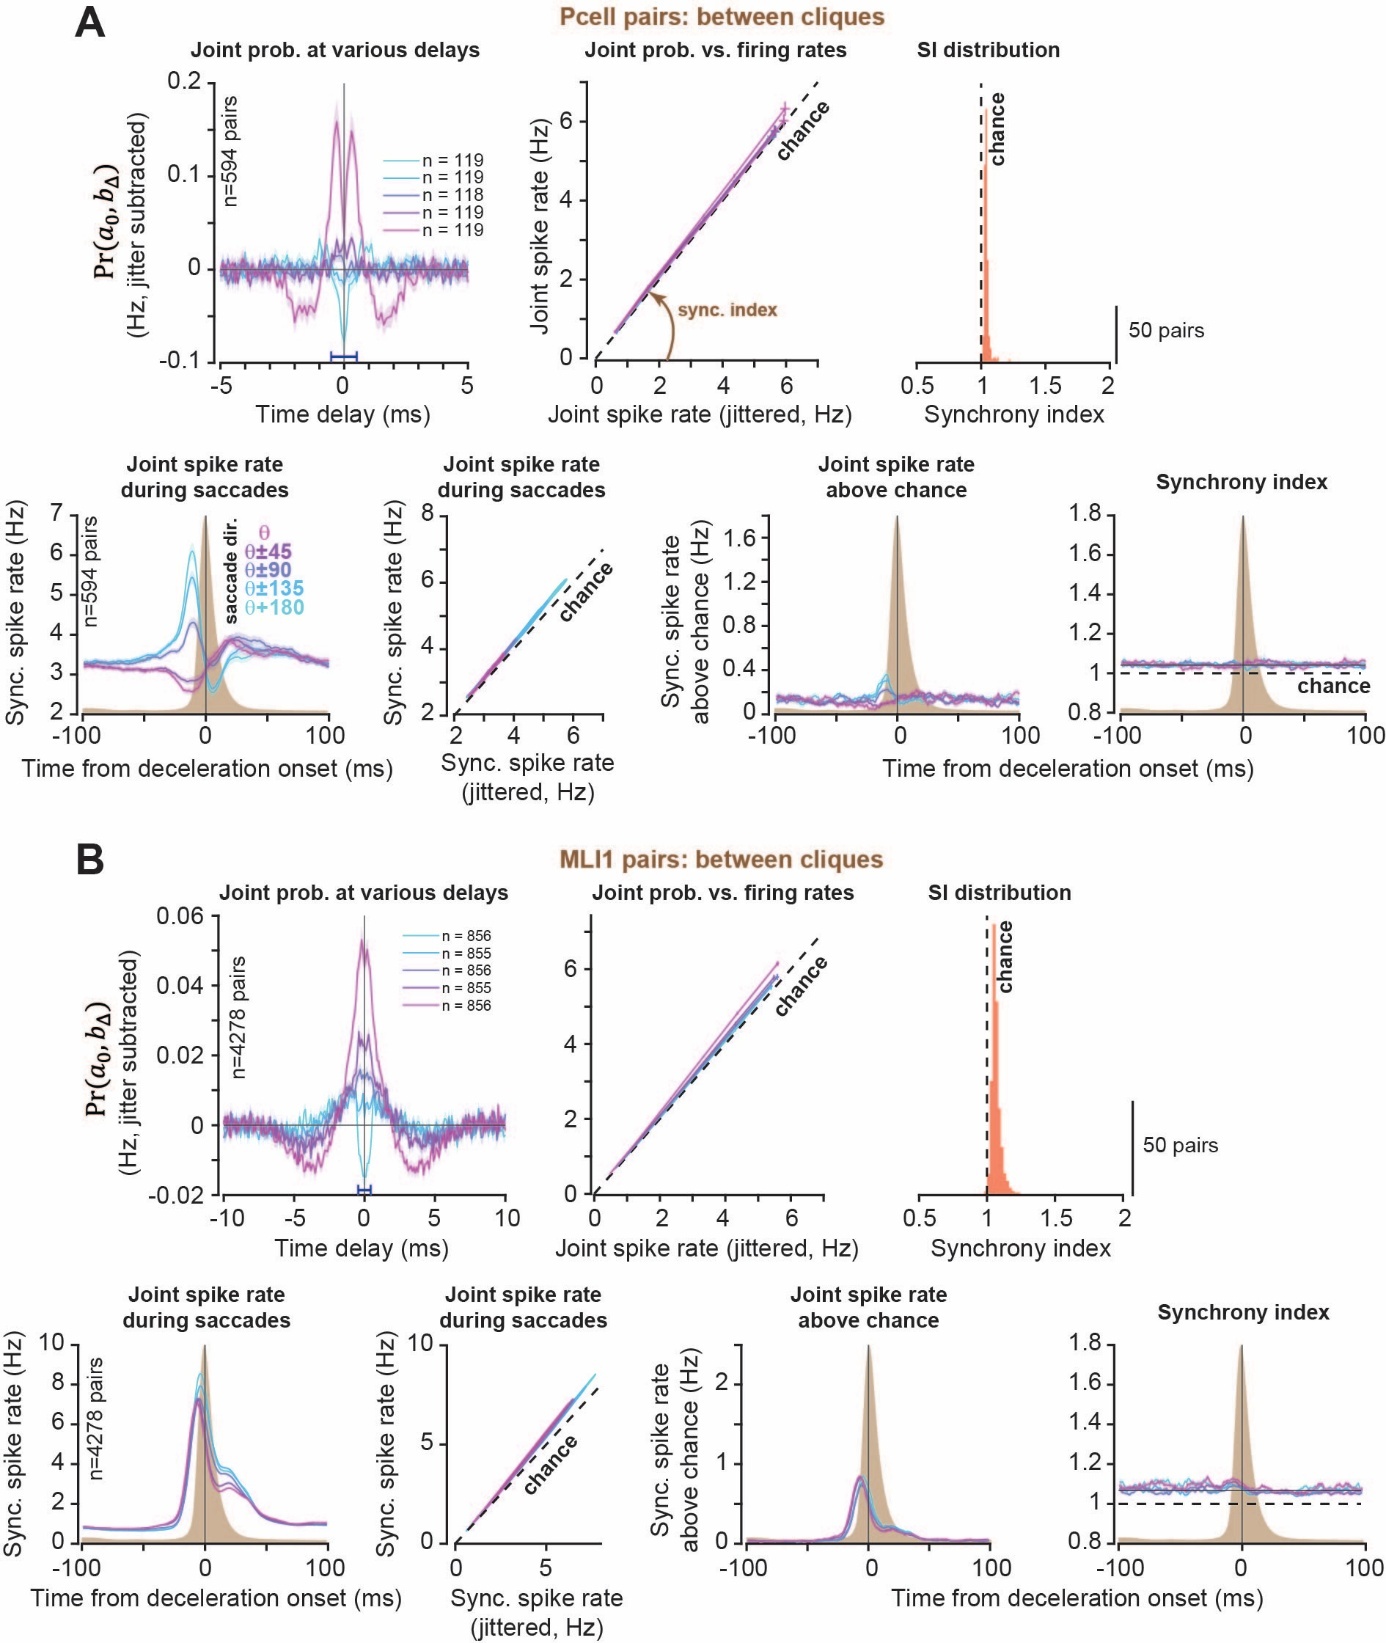


**Fig. S7. Between clique synchrony during behavior and whole recording.** **(A)** (top) P-cell cross-correlogram (left), and joint-jitter plots (middle) binned by synchrony index (compare with Fig. 3 within clique). (Bottom) Synchronous spike rate, joint-jitter plots, synchronous spike rate above chance and synchrony index aligned to saccade deceleration onset. **(B)** same as (A) but for between clique pMLI1s.


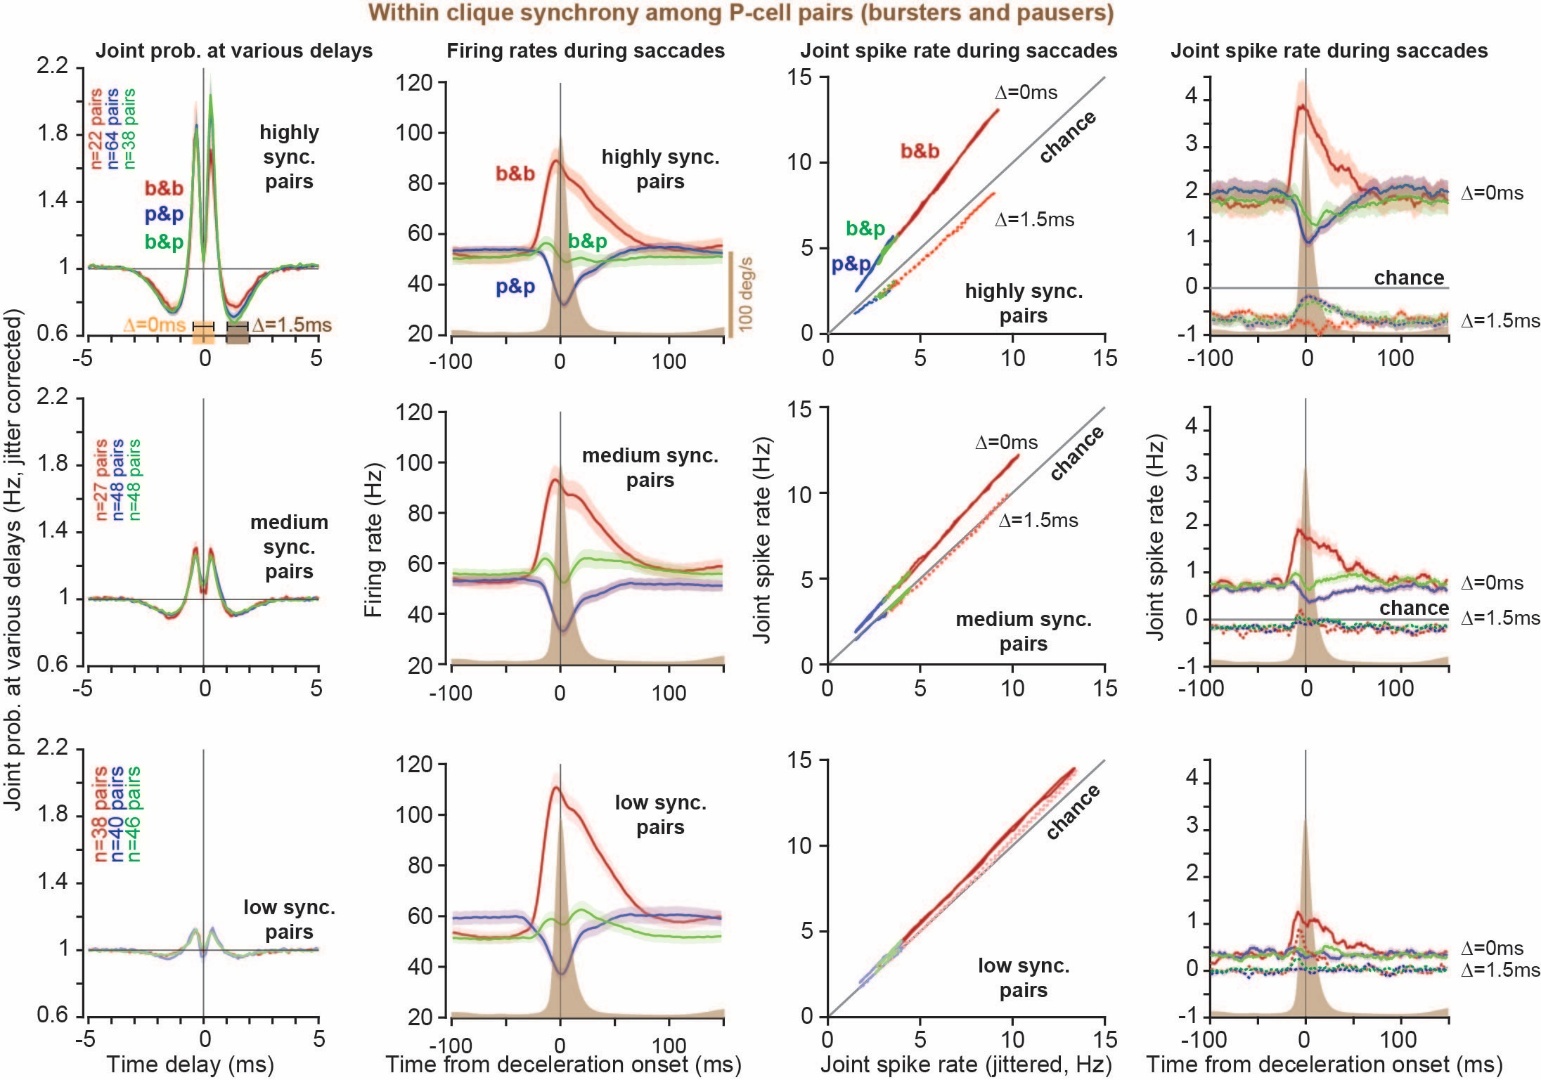


**Fig. S8. Joint spike rates at various delays during saccades in pairs of P-cells, organized by combinations of burster/pauser P-cell pairs based on strength of ephaptic coupling.** (Left to right) Jitter corrected whole recording cross-correlograms, average pair firing rates aligned to saccade deceleration onset, joint-jitter plots, and corrected joint probability for burster-burster (red), pauser-pauser (blue), and burster-pauser (green) pairs. Pairs are divided into high, medium, and low synchrony index groups from top to bottom. Note that in the burster pairs with greatest strength of ephaptic coupling (high synch pairs), joint probability of synchronous spikes at ms peaks at saccade deceleration onset while the probability of slightly asynchronous spikes at ms is suppressed below chance.

**
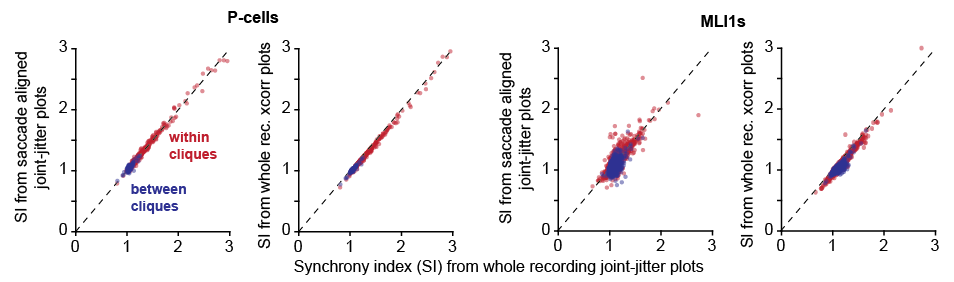
**

**Fig. S9. Three different methods of calculating synchrony index produce similar values.** Synchrony index from saccade aligned joint jitter plots and synchrony index from whole recording cross-probabilities versus synchrony index from whole recording joint-jitter plots for P-cells (left) and pMLI1s (right). The cross-probability estimate of synchrony index is calculated as the average of the jitter-corrected value during the period -0.5 to +0.5 ms.

**
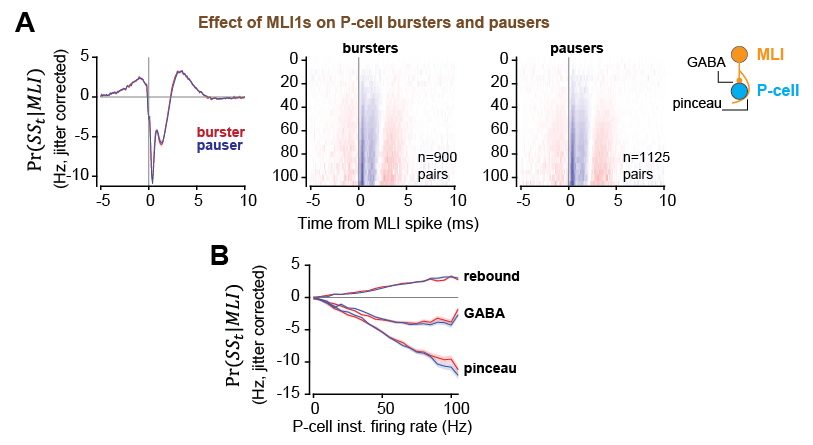
**

**Fig. S10. The pMLI1s suppress burster and pauser P-cells similarly.** **(A)** (left) jitter corrected cross-correlograms between P-cell bursters (red) and pausers (blue) and pMLI1s for the whole recording period. (Right) Same as (A) but 3D cross-correlograms binned by P-cells instantaneous firing rates. **(B)** Pinceau (0-0.8ms), GABA (0.8-2.5ms), and rebound (2.5-6ms) period average effect for bursters (red) and pausers (blue) as a function of P-cell rate.

**
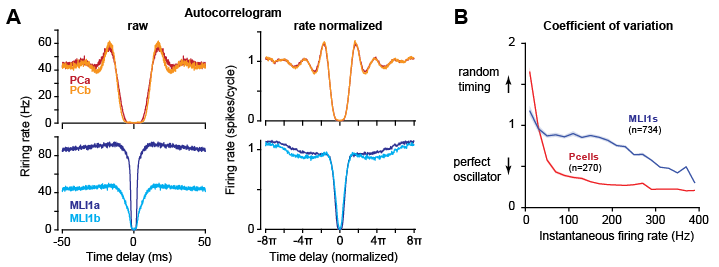
**

**Fig. S11. Auto correlogram and phase normalized analysis for two example pairs of P-cells and pMLI1s. (A)** auto correlogram (left) and phase-normalized auto correlogram (right) for two example P-cells (top) and pMLI1s (bottom) presented in Fig, 2A-C. **(B)** Coefficient of variation as a function of instantaneous firing rate for all P-cells (red) and pMLI1s (blue). Values are calculated using the 3D ISI distributions in Fig. 5A. Error bars are SEM.

**
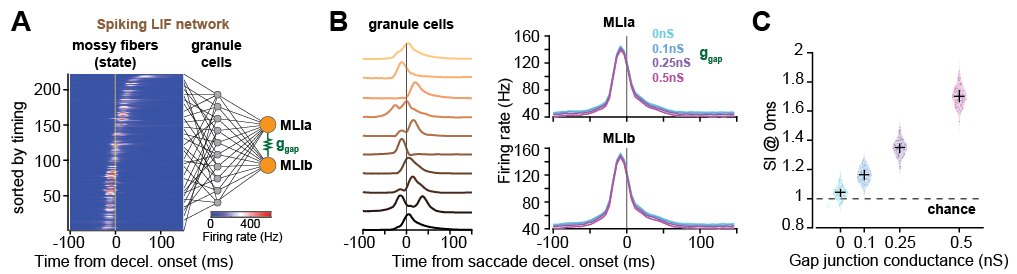
**

**Fig. S12. Simulation results. Model of MLI1s with gap junctions replicates the mathematical regularity in the joint-jitter plots.** **(A)** We simulated 10 granule cells using random connections to our recorded state mossy fiber average firing rates to task-relevant saccades. We simulated each granule cell using non-homogeneous Poisson process (see methods). We then connected these 10 granule cells randomly to two MLI1 LIF neurons with different gap junction values between them. Data for the mossy fibers was from our recordings. **(B)** Average firing rate of simulated granule cells (left) and MLIs for different gap junction values (right). **(C)** Slope of joint jitter plots (synchrony index) as a function of gap junction values.

**
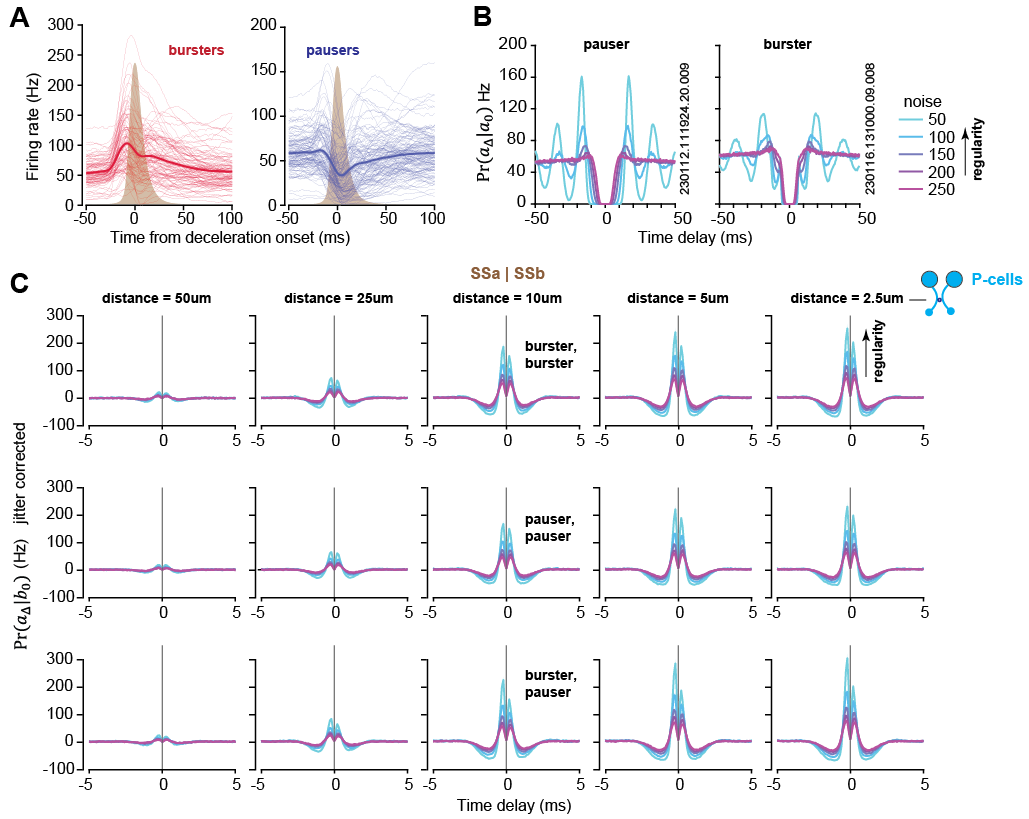
**

**Fig. S13. Simulation results. Model of ephaptically coupled P-cells shows that synchrony increases with both regularity and strength of ephaptic coupling.** **(A)** Trial-averaged actual simple spike firing rates for burster P-cells (n = 101) and pauser P-cells (n=125) aligned to onset of saccade deceleration. The thin lines show the rates of individual P-cells, and the thick line shows the population-averaged saccade response. The average saccade velocity profile is represented by the brown patch. **(B)** Auto-correlograms of two example simulated P-cells (left: pauser, right: burster), simulated with various regularities. The ID number on the right refers to the actual P-cell firing rates from which the simulated results were produced. **(C)** Jitter corrected cross-correlograms for simulated P-cell pairs under various conditions. Each row represents a different type of P-cell pairing (from top to bottom: burster-burster, burster-pauser, pauser-pauser) and each column represents a different strength of ephaptic coupling (from left to right, decreasing distance between axonal initial segments of the paired P-cells, which corresponds to increasing strength of ephaptic coupling). Colors represent various regularities, scaled from least (magenta) to most (cyan) regular as in (B). Note that for any given ephaptic coupling, increased regularity increases synchrony. Similarly, for any given regularity, increased ephaptic coupling, i.e., reduced distance, increases synchrony.

**
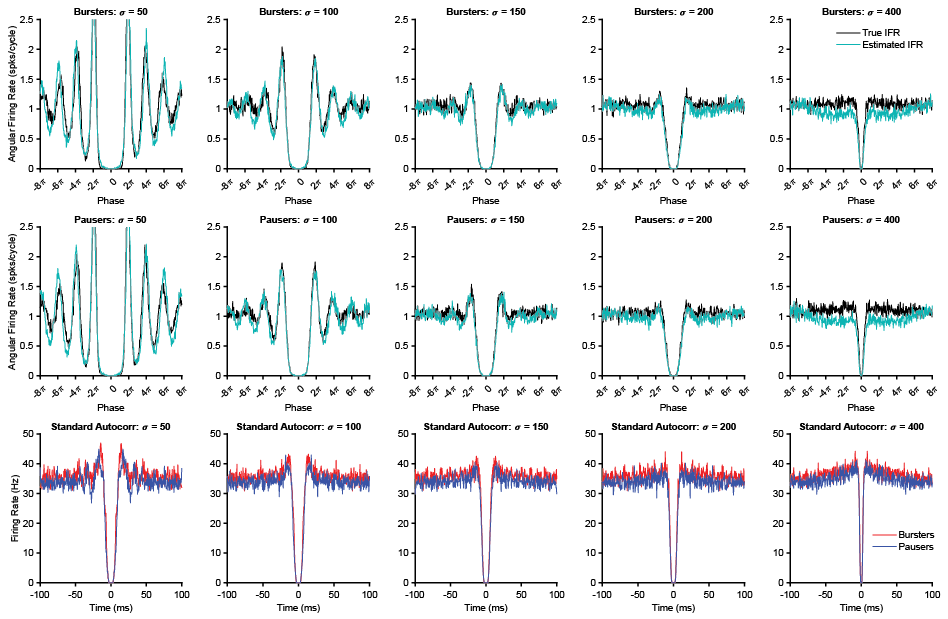
**

**Fig. S14. Simulation results. Validation of instantaneous firing rate phase normalization methods using ground truth data.** Top: Conditional spiking probability as a function of phase for simulated spike trains with various levels of noise: left to right: σ = 50,100,150,200,400. The spike trains were generated with target firing rates given by concatenation of the trial-averaged firing rates for each recorded burster P-cell, aligned to the time at which the eye reached maximum velocity for each saccade. Phase was measured using two different firing rates: the target firing rates that were used to generate the spike trains (black), and the estimated instantaneous firing rate found by smoothing the inverse of the inter-spike intervals, as was used to measure phase for the real data (blue). The results show minimal bias in using the estimated instantaneous firing rate compared to the ground truth firing rate. Middle: Same analysis applied to simulated spike trains that were generated by concatenation of trial-averaged pauser firing rates. Bottom: Standard auto correlograms for the simulated burster and pauser spike trains. These figures demonstrate how the regularity that is apparent in the phase-normalized conditional firing plots can be obscured due to variations in firing rate over time, explaining why some regular real P-cells do not show obvious signs of oscillatory behavior in their auto correlograms.

**
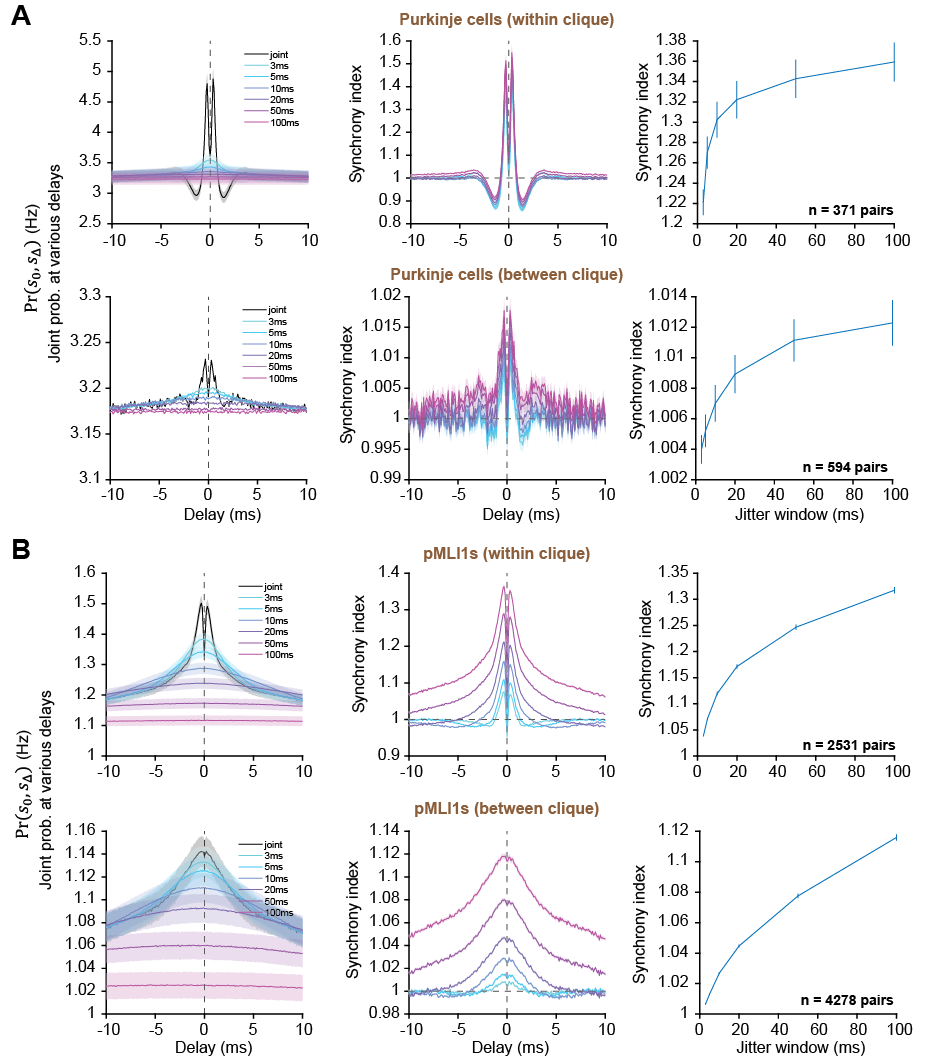
**

**Fig. S15. Effect of jittering window on measured synchrony values.** **(A)** (left) Average joint firing rate of two P-cells for different jittering window values, (middle) same as (left) but normalized by jittered rates (synchrony index), (right) synchrony index values (average from -0.5 to 0.5ms delay) for each jittering window size for pairs within (top) and between (bottom) cliques. **(B)** same as (A) for pMLI1s.


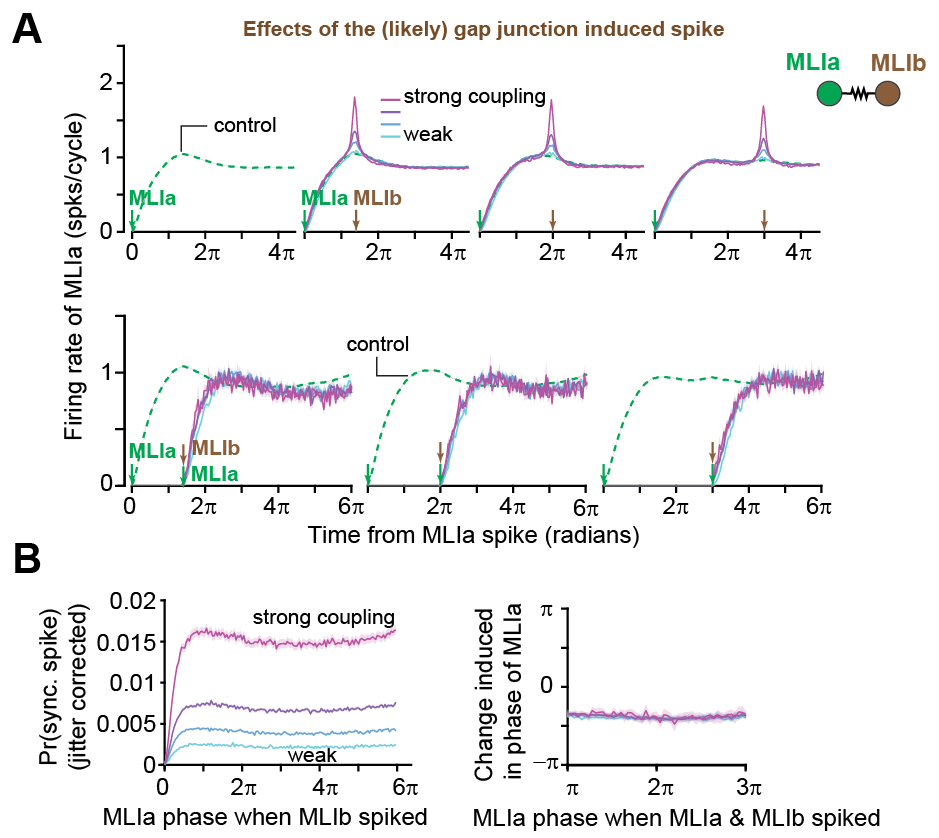


**Fig. S16. Phase resetting is not present among pairs of pMLI1s**. **(A)** Analogous to Fig. 5D, but for pMLI1s instead of P-cells. (Top) Conditional probability of MLIa firing at each phase given a neighboring MLIb within a clique spiked at a given phase, grouped by different MLIa and MLIb gap junction strengths: from left to right: Control, MLIb at 7π/5, 2π, and 3π. (bottom) Probability of MLIa firing at each phase given MLIb spiked at a given phase with respect to MLIa and induced a synchronous spike in MLIa: from left to right Δ=7π/5, 2π, and 3π. **(B)** Analogous to Fig 5E. (left) Probability of synchronous spike (jitter corrected joint spiking of MLIa and MLIb) given MLIb spiked at different phases with respect to MLIa, grouped by gap junction strength. MLIa phase has no impact on the chance that an MLIb spike will induce a synchronous spike, except during the refractory period. (right) Expected change in phase of MLIa as a function of the phase when MLIa and MLIb spiked synchronously. The expected change is constant with respect to the phase when the synchronous spike occurred, suggesting that phase carries no information for irregular cells such as MLIs.

**
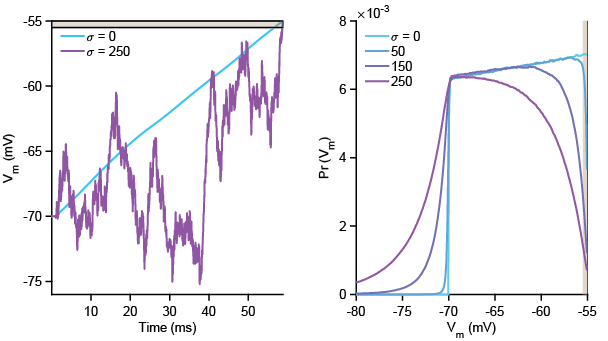
**

**Fig. S17.** **Simulation results.** Regularity increases the time spent in the ephaptic spiking band. Left: Example simulated membrane voltage traces for a neuron with no noise (blue) and with high noise (magenta). The gold shaded region is the ephaptic spiking band, the range of voltages within which the small voltage perturbation caused by an ephaptic interaction may be sufficient to induce a spike. Right: Distribution of membrane voltage values for four simulated neurons with different noise levels. The frequency of occurrence of membrane voltage values near threshold decreases with increasing noise.

**Table 1. Parameter values for P-cell ephaptic coupling simulations**

| **Parameter** | **Value** |
| --- | --- |
| **P-cell intrinsic parameters** | |
| Membrane capacitance | 20 nF |
| Leak conductance | 0.5 |
| Membrane time constant | 40 ms |
| Leak reversal potential | -70 mV |
| Refractory period | 1 ms |
| Spike threshold | -55 mV |
| Intracellular spike max amplitude | 35 mV |
| Extracellular spike max amplitude | -0.97 mV |
| Spike shape kernel parameters |  |
| **P-cell input parameters** | |
| Linear rate-to-current gain | 0.4083 nA/Hz |
| External current standard deviation | {50, 150, 250} nA |
| **Ephaptic coupling parameters** | |
| AIS-AIS distance | {2.5, 5, 10, 25, 50} |
| Geometry/offset constant | 320 |
| **Trial parameters** | |
| Simulation time step | 0.0333 ms |
| Simulation duration | 240 seconds |
| Number of trials per simulation | 500 trials |
| Number of simulations per condition | 120 |

**Table 2. Parameter values for MLI gap-junction simulations**

| **Parameter** | **Value** |
| --- | --- |
| **MLI intrinsic parameters** | |
| Membrane capacitance | 10 pF |
| Leak conductance | 2.5 n |
| Membrane time constant | 4 ms |
| Leak reversal potential | -70 mV |
| Refractory period | 0.5 ms |
| Spike threshold | -55 mV |
| **MLI input parameters** | |
| AMPA | 0.1659 ms |
| AMPA | 2.9381 ms |
| Glutamatergic reversal potential | 0 mV |
| Glutamatergic conductance | 0.25 n |
| External current mean | 0.028 nA |
| External current standard deviation | 0.016 nA |
| Gap junction conductance | {0, 1, 2.5, 5} nS |
| **PF parameters** | |
| Refractory period | 0.5 ms |
| Num. MF inputs per PF | 3-5 neurons |
| Num. PF | 10 neurons |
| **Trial parameters** | |
| Simulation time step (dt) | 0.0333 ms |
| Simulation duration | 500 seconds |
| Num. behavioral trials | 3 saccades per second |
| Num. simulations per condition | 120 |

1. Galarreta, M. & Hestrin, S. A network of fast-spiking cells in the neocortex connected by electrical synapses. *Nature* **402**, 72–75 (1999).

2. Landisman, C. E. *et al.* Electrical Synapses in the Thalamic Reticular Nucleus. *J. Neurosci.* **22**, 1002–1009 (2002).

3. Alcami, P. & Marty, A. Estimating functional connectivity in an electrically coupled interneuron network. *Proc. Natl. Acad. Sci.* **110**, E4798–E4807 (2013).

4. Kim, J. *et al.* Optogenetic Mapping of Cerebellar Inhibitory Circuitry Reveals Spatially Biased Coordination of Interneurons via Electrical Synapses. *Cell Rep.* **7**, 1601–1613 (2014).

5. Han, K. S. *et al.* Ephaptic Coupling Promotes Synchronous Firing of Cerebellar Purkinje Cells. *Neuron* **100**, 564–578 (2018).

6. Rieubland, S., Roth, A. & Häusser, M. Structured Connectivity in Cerebellar Inhibitory Networks. *Neuron* **81**, 913–929 (2014).

7. Fakharian, M. A., Shoup, A. M., Hage, P., Elseweifi, H. Y. & Shadmehr, R. A vector calculus for neural computation in the cerebellum. *Science* **388**, 869–875 (2025).

8. Blot, A. *et al.* Time-invariant feed-forward inhibition of Purkinje cells in the cerebellar cortex in vivo. *J. Physiol.* **594**, 2729–2749 (2016).

9. Brown, A. M. *et al.* Molecular layer interneurons shape the spike activity of cerebellar Purkinje cells. *Sci.Rep.* **9**, 1742 (2019).

10. Hausser, M. & Clark, B. A. Tonic synaptic inhibition modulates neuronal output pattern and spatiotemporal synaptic integration. *Neuron* **19**, 665–678 (1997).

11. Jelitai, M., Puggioni, P., Ishikawa, T., Rinaldi, A. & Duguid, I. Dendritic excitation–inhibition balance shapes cerebellar output during motor behaviour. *Nat. Commun.* **7**, 13722 (2016).

12. Wulff, P. *et al.* Synaptic inhibition of Purkinje cells mediates consolidation of vestibulo-cerebellar motor learning. *Nat. Neurosci.* **12**, 1042–1049 (2009).

13. Gao, H., Solages, C. & Lena, C. Tetrode recordings in the cerebellar cortex. *JPhysiol Paris* **106**, 128–136 (2012).

14. Han, K.-S., Chen, C. H., Khan, M. M., Guo, C. & Regehr, W. G. Climbing fiber synapses rapidly and transiently inhibit neighboring Purkinje cells via ephaptic coupling. *Nat. Neurosci.* **23**, 1399–1409 (2020).

15. Szapiro, G. & Barbour, B. Multiple climbing fibers signal to molecular layer interneurons exclusively via glutamate spillover. *Nat.Neurosci.* **10**, 735–742 (2007).

16. Malhotra, S. *et al.* Climbing Fiber-Mediated Spillover Transmission to Interneurons Is Regulated by EAAT4. *J. Neurosci.* **41**, 8126–8133 (2021).

17. Lackey, E. P. *et al.* Specialized connectivity of molecular layer interneuron subtypes leads to disinhibition and synchronous inhibition of cerebellar Purkinje cells. *Neuron* **112**, 2333-2348.e6 (2024).

18. Blot, A. & Barbour, B. Ultra-rapid axon-axon ephaptic inhibition of cerebellar Purkinje cells by the pinceau. *Nat. Neurosci.* **17**, 289–295 (2014).

19. Lackey, E. P. *et al.* Purkinje cell collaterals preferentially target a subtype of molecular layer interneuron. 2025.07.17.665322 Preprint at https://doi.org/10.1101/2025.07.17.665322 (2025).

20. Park, C. *et al.* A cerebellar disinhibitory circuit supports synaptic plasticity. 2023.09.15.557147 Preprint at https://doi.org/10.1101/2023.09.15.557147 (2023).

21. Santos-Valencia, F. *et al.* Climbing fibers selectively recruit disinhibitory interneurons to enhance dendritic calcium signaling in cerebellar Purkinje cells. 2025.06.22.660768 Preprint at https://doi.org/10.1101/2025.06.22.660768 (2025).

22. Amarasingham, A., Harrison, M. T., Hatsopoulos, N. G. & Geman, S. Conditional modeling and the jitter method of spike resampling. *J. Neurophysiol.* **107**, 517–531 (2012).

23. Platkiewicz, J., Stark, E. & Amarasingham, A. Spike-Centered Jitter Can Mistake Temporal Structure. *Neural Comput.* **29**, 783–803 (2017).

24. Pi, J. S. *et al.* The olivary input to the cerebellum dissociates sensory events from movement plans. *Proc. Natl. Acad. Sci.* **121**, e2318849121 (2024).

25. Hage, P. *et al.* Effort cost of harvest affects decisions and movement vigor of marmosets during foraging. *eLife* **12**, RP87238 (2023).

26. Herzfeld, D. J., Joshua, M. & Lisberger, S. G. Rate versus synchrony codes for cerebellar control of motor behavior. *Neuron* **111**, 2448-2460.e6 (2023).

27. Herzfeld, D. J., Kojima, Y., Soetedjo, R. & Shadmehr, R. Encoding of action by the Purkinje cells of the cerebellum. *Nature* **526**, 439–442 (2015).

28. Muller, S. Z. *et al.* Complex spikes perturb movements and reveal the sensorimotor map of Purkinje cells. *Curr. Biol.* **33**, 4869-4879.e3 (2023).

29. Zhou, J. *et al.* Purkinje cell neurotransmission patterns cerebellar basket cells into zonal modules defined by distinct pinceau sizes. *eLife* **9**, e55569 (2020).

30. Herzfeld, D. J., Hall, N. J. & Lisberger, S. G. Strategies to Decipher Neuron Identity from Extracellular Recordings in Behaving Nonhuman Primates. *J. Neurosci.* **45**, (2025).

31. Payne, H. L. *et al.* Cerebellar Purkinje cells control eye movements with a rapid rate code that is invariant to spike irregularity. *eLife* **8**, (2019).

32. Xiao, J. *et al.* Systematic Regional Variations in Purkinje Cell Spiking Patterns. *PLOS ONE* **9**, e105633 (2014).

33. Zhou, H. *et al.* Cerebellar modules operate at different frequencies. *eLife* **3**, e02536 (2014).

34. Witter, L. & De Zeeuw, C. I. In Vivo Differences in Inputs and Spiking Between Neurons in Lobules VI/VII of Neocerebellum and Lobule X of Archaeocerebellum. *The Cerebellum* **14**, 506–515 (2015).

35. Heck, D. H., Thach, W. T. & Keating, J. G. On-beam synchrony in the cerebellum as the mechanism for the timing and coordination of movement. *Proc.Natl.Acad.Sci.U.S.A* **104**, 7658–7663 (2007).

36. Mann-Metzer, P. & Yarom, Y. Electrotonic Coupling Interacts with Intrinsic Properties to Generate Synchronized Activity in Cerebellar Networks of Inhibitory Interneurons. *J. Neurosci.* **19**, 3298–3306 (1999).

37. Brown, S. T. *et al.* High-speed voltage imaging of action potentials in molecular layer interneurons reveals sensory-driven synchrony that augments movement. *Cell Rep.* **44**, 116148 (2025).

38. Anastassiou, C. A., Perin, R., Markram, H. & Koch, C. Ephaptic coupling of cortical neurons. *Nat. Neurosci.* **14**, 217–223 (2011).

39. Ventura, V., Cai, C. & Kass, R. E. Trial-to-Trial Variability and Its Effect on Time-Varying Dependency Between Two Neurons. *J. Neurophysiol.* **94**, 2928–2939 (2005).

40. Sedaghat-Nejad, E., Pi, J. S., Hage, P., Fakharian, M. A. & Shadmehr, R. Synchronous spiking of cerebellar Purkinje cells during control of movements. *Proc. Natl. Acad. Sci.* **119**, e2118954119 (2022).

41. Norton, A. *et al.* Structural and functional evidence for ephaptic control of Purkinje cell spike timing by networks of molecular layer interneurons. 2025.12.28.696768 Preprint at https://doi.org/10.64898/2025.12.28.696768 (2025).

42. Person, A. L. & Raman, I. M. Purkinje neuron synchrony elicits time-locked spiking in the cerebellar nuclei. *Nature* **481**, 502–505 (2012).

43. Gauck, V. & Jaeger, D. The Control of Rate and Timing of Spikes in the Deep Cerebellar Nuclei by Inhibition. *J. Neurosci.* **20**, 3006–3016 (2000).

44. Nashef, A., Spindle, M. S., Calame, D. J. & Person, A. L. A dual Purkinje cell rate and synchrony code sculpts reach kinematics. 2023.07.12.548720 Preprint at https://doi.org/10.1101/2023.07.12.548720 (2023).

45. Özcan, O. O. *et al.* Differential Coding Strategies in Glutamatergic and GABAergic Neurons in the Medial Cerebellar Nucleus. *J. Neurosci.* **40**, 159–170 (2020).

46. Najac, M., McLean, D. L. & Raman, I. M. Synaptic variance and action potential firing of cerebellar output neurons during motor learning in larval zebrafish. *Curr. Biol.* **33**, 3299-3311.e3 (2023).

47. Brown, S. T., Medina-Pizarro, M., Holla, M., Vaaga, C. E. & Raman, I. M. Simple spike patterns and synaptic mechanisms encoding sensory and motor signals in Purkinje cells and the cerebellar nuclei. *Neuron* **112**, 1848-1861.e4 (2024).

48. Hong, S. *et al.* Multiplexed coding by cerebellar Purkinje neurons. *eLife* **5**, (2016).

49. Shin, S. L. & De Schutter, E. Dynamic synchronization of Purkinje cell simple spikes. *J.Neurophysiol.* **96**, 3485–3491 (2006).

50. Wise, A. K., Cerminara, N. L., Marple-Horvat, D. E. & Apps, R. Mechanisms of synchronous activity in cerebellar Purkinje cells. *J.Physiol* **588**, 2373–2390 (2010).

51. Wehr, M. & Zador, A. M. Balanced inhibition underlies tuning and sharpens spike timing in auditory cortex. *Nature* **426**, 442–446 (2003).

52. Alcami, P. Electrical Synapses Enhance and Accelerate Interneuron Recruitment in Response to Coincident and Sequential Excitation. *Front. Cell. Neurosci.* **12**, (2018).

53. de Solages, C. *et al.* High-Frequency Organization and Synchrony of Activity in the Purkinje Cell Layer of the Cerebellum. *Neuron* **58**, 775–788 (2008).

54. Kim, J. & Augustine, G. J. Molecular Layer Interneurons: Key Elements of Cerebellar Network Computation and Behavior. *Neuroscience* **462**, 22–35 (2021).

55. De Zeeuw, C. I. *et al.* Spatiotemporal firing patterns in the cerebellum. *Nat.Rev.Neurosci.* **12**, 327–344 (2011).

56. Hoebeek, F. E. *et al.* Increased Noise Level of Purkinje Cell Activities Minimizes Impact of Their Modulation during Sensorimotor Control. *Neuron* **45**, 953–965 (2005).

57. Wu, W.-C., Bradley, S. P., Christie, J. M. & Pugh, J. R. Mechanisms and consequences of cerebellar Purkinje cell disinhibition in a mouse model of Duchenne muscular dystrophy. *J. Neurosci.* https://doi.org/10.1523/JNEUROSCI.1256-21.2022 (2022) doi:10.1523/JNEUROSCI.1256-21.2022.

58. Walter, J. T., Alviña, K., Womack, M. D., Chevez, C. & Khodakhah, K. Decreases in the precision of Purkinje cell pacemaking cause cerebellar dysfunction and ataxia. *Nat. Neurosci.* **9**, 389–397 (2006).

59. Alviña, K. & Khodakhah, K. The Therapeutic Mode of Action of 4-Aminopyridine in Cerebellar Ataxia. *J. Neurosci.* **30**, 7258–7268 (2010).

60. Sedaghat-Nejad, E. *et al.* Behavioral training of marmosets and electrophysiological recording from the cerebellum. *J.Neurophysiol.* **122**, 1502–1517 (2019).

61. Liu, C. *et al.* A digital 3D atlas of the marmoset brain based on multi-modal MRI. *NeuroImage* **169**, 106–116 (2018).

62. Shoup, A. M. *et al.* Rejuvenating silicon probes for acute neurophysiology. *J. Neurophysiol.* **132**, 308–315 (2024).

63. Hage, P. *et al.* Control of tongue movements by the Purkinje cells of the cerebellum. 2024.07.25.604757 Preprint at https://doi.org/10.1101/2024.07.25.604757 (2024).

64. Bellet, M. E., Bellet, J., Nienborg, H., Hafed, Z. M. & Berens, P. Human-level saccade detection performance using deep neural networks. *J. Neurophysiol.* **121**, 646–661 (2019).

65. Leigh, R. J. & Zee, D. S. *The Neurology of Eye Movements*. (Oxford University Press, 2015).

66. Siegle, J. H. *et al.* Open Ephys: an open-source, plugin-based platform for multichannel electrophysiology. *JNeural Eng* **14**, 045003 (2017).

67. Pachitariu, M., Steinmetz, N., Kadir, S., Carandini, M. & D, H. K. Kilosort: realtime spike-sorting for extracellular electrophysiology with hundreds of channels. *bioRxiv* 061481 (2016) doi:10.1101/061481.

68. Sedaghat-Nejad, E. *et al.* P-sort: an open-source software for cerebellar neurophysiology. *J. Neurophysiol.* **126**, 1055–1075 (2021).

69. Walsh, J. V., Houk, J. C. & Mugnaini, E. Identification of unitary potentials in turtle cerebellum and correlations with structures in granular layer. *J.Neurophsyiol.* **37**, 30–47 (1974).

70. van Kan, P. L., Gibson, A. R. & Houk, J. C. Movement-related inputs to intermediate cerebellum of the monkey. *J. Neurophysiol.* **69**, 74–94 (1993).

71. Tomatsu, S. *et al.* Information processing in the hemisphere of the cerebellar cortex for control of wrist movement. *J.Neurophysiol.* **115**, 255–270 (2016).

72. von Luxburg, U. A tutorial on spectral clustering. *Stat. Comput.* **17**, 395–416 (2007).

73. Soetedjo, R., Kojima, Y. & Fuchs, A. F. How cerebellar motor learning keeps saccades accurate. *J. Neurophysiol.* **121**, 2153–2162 (2019).

74. Soetedjo, R. & Fuchs, A. F. Complex spike activity of purkinje cells in the oculomotor vermis during behavioral adaptation of monkey saccades. *J Neurosci* **26**, 7741–7755 (2006).

75. May, P. J., Warren, S. & Kojima, Y. The superior colliculus projection upon the macaque inferior olive. *Brain Struct. Funct.* https://doi.org/10.1007/s00429-023-02743-7 (2024) doi:10.1007/s00429-023-02743-7.

76. Berens, P. CircStat: A MATLAB Toolbox for Circular Statistics. *J. Stat. Softw.* **31**, 1–21 (2009).

77. Forti, L., Bossi, M., Bergamaschi, A., Villa, A. & Malgaroli, A. Loose-patch recordings of single quanta at individual hippocampal synapses. *Nature* **388**, 874–878 (1997).

78. Kleppe, I. C. & Robinson, H. P. C. Determining the Activation Time Course of Synaptic AMPA Receptors from Openings of Colocalized NMDA Receptors. *Biophys. J.* **77**, 1418–1427 (1999).

79. Lalanne, T. *et al.* Synapse-specific expression of calcium-permeable AMPA receptors in neocortical layer 5. *J. Physiol.* **594**, 837–861 (2016).

80. Li, C. & Gulledge, A. T. NMDA Receptors Enhance the Fidelity of Synaptic Integration. *eNeuro* **8**, (2021).

81. Rajaram, E. *et al.* Slow NMDA-Mediated Excitation Accelerates Offset-Response Latencies Generated via a Post-Inhibitory Rebound Mechanism. *eNeuro* **6**, (2019).

82. Nguyen, T. M. *et al.* Structured cerebellar connectivity supports resilient pattern separation. *Nature* **613**, 543–549 (2023).

83. Markanday, A., Hong, S., Inoue, J., De Schutter, E. & Thier, P. Multidimensional cerebellar computations for flexible kinematic control of movements. *Nat. Commun.* **14**, 2548 (2023).

84. Ohtsuka, K. & Noda, H. Burst discharges of mossy fibers in the oculomotor vermis of macaque monkeys during saccadic eye movements. *Neurosci.Res.* **15**, 102–114 (1992).

85. Prsa, M., Dash, S., Catz, N., Dicke, P. W. & Thier, P. Characteristics of responses of Golgi cells and mossy fibers to eye saccades and saccadic adaptation recorded from the posterior vermis of the cerebellum. *J.Neurosci.* **29**, 250–262 (2009).

86. De Boor, C. *A Practical Guide to Splines*. (Springer, NY, 1978).
